# Supplementary material for: High-throughput phenotyping analysis of maize at the seedling stage using end-to-end segmentation network
Source: PubMed Central journal article supplement (PMC7802938; doi:10.1371/journal.pone.0241528), 2021-01-12
Supplement: pone.0241528.s005.pdf [file pone.0241528.s005.pdf]

# PLOS ONE

## High-throughput phenotyping analysis of maize at the seedling stage using end-to-end segmentation network --Manuscript Draft--

|                                                                                                                                                                                                                                                                                                                   |                                                                                                                                                                                                                                                                                                                                                                                                                                                                                                                                                                                                                                                                                                                                                                                                                                                                                                                                                                                                                                                                                                                                                                                                                                                                                                                                                                                                                                                                                                                                                                                               |
|-------------------------------------------------------------------------------------------------------------------------------------------------------------------------------------------------------------------------------------------------------------------------------------------------------------------|-----------------------------------------------------------------------------------------------------------------------------------------------------------------------------------------------------------------------------------------------------------------------------------------------------------------------------------------------------------------------------------------------------------------------------------------------------------------------------------------------------------------------------------------------------------------------------------------------------------------------------------------------------------------------------------------------------------------------------------------------------------------------------------------------------------------------------------------------------------------------------------------------------------------------------------------------------------------------------------------------------------------------------------------------------------------------------------------------------------------------------------------------------------------------------------------------------------------------------------------------------------------------------------------------------------------------------------------------------------------------------------------------------------------------------------------------------------------------------------------------------------------------------------------------------------------------------------------------|
| <b>Manuscript Number:</b>                                                                                                                                                                                                                                                                                         | PONE-D-20-32300                                                                                                                                                                                                                                                                                                                                                                                                                                                                                                                                                                                                                                                                                                                                                                                                                                                                                                                                                                                                                                                                                                                                                                                                                                                                                                                                                                                                                                                                                                                                                                               |
| <b>Article Type:</b>                                                                                                                                                                                                                                                                                              | Research Article                                                                                                                                                                                                                                                                                                                                                                                                                                                                                                                                                                                                                                                                                                                                                                                                                                                                                                                                                                                                                                                                                                                                                                                                                                                                                                                                                                                                                                                                                                                                                                              |
| <b>Full Title:</b>                                                                                                                                                                                                                                                                                                | High-throughput phenotyping analysis of maize at the seedling stage using end-to-end segmentation network                                                                                                                                                                                                                                                                                                                                                                                                                                                                                                                                                                                                                                                                                                                                                                                                                                                                                                                                                                                                                                                                                                                                                                                                                                                                                                                                                                                                                                                                                     |
| <b>Short Title:</b>                                                                                                                                                                                                                                                                                               | High-throughput phenotyping analysis of seedling maize                                                                                                                                                                                                                                                                                                                                                                                                                                                                                                                                                                                                                                                                                                                                                                                                                                                                                                                                                                                                                                                                                                                                                                                                                                                                                                                                                                                                                                                                                                                                        |
| <b>Corresponding Author:</b>                                                                                                                                                                                                                                                                                      | Weiliang Wen<br>National Engineering Research Center for Information Technology in Agriculture<br>Beijing, Beijing CHINA                                                                                                                                                                                                                                                                                                                                                                                                                                                                                                                                                                                                                                                                                                                                                                                                                                                                                                                                                                                                                                                                                                                                                                                                                                                                                                                                                                                                                                                                      |
| <b>Keywords:</b>                                                                                                                                                                                                                                                                                                  | maize; deep learning; top-view; image segmentation; phenotype extraction                                                                                                                                                                                                                                                                                                                                                                                                                                                                                                                                                                                                                                                                                                                                                                                                                                                                                                                                                                                                                                                                                                                                                                                                                                                                                                                                                                                                                                                                                                                      |
| <b>Abstract:</b>                                                                                                                                                                                                                                                                                                  | Image processing technologies are available for high-throughput acquisition and analysis of phenotypes for crop populations, which is of great significance for crop growth monitoring, evaluation of seedling condition, and cultivation management. However, existing methods rely on empirical segmentation thresholds, thus can have insufficient accuracy of extracted phenotypes. Taking maize as an example crop, we propose a phenotype extraction approach from top-view images at the seedling stage. An end-to-end segmentation network, named PlantU-net, which uses a small amount of training data, was explored to realize automatic segmentation of top-view images of a maize population at the seedling stage. Morphological and color related phenotypes were automatic extracted, including maize shoot coverage, circumscribed radius, aspect ratio, and plant azimuth plane angle. The results show that the approach can segment the shoots at the seedling stage from top-view images, obtained either from the UAV or ground high-throughput phenotyping platform. The average segmentation accuracy, recall rate, and F1 score are 0.96, 0.98, and 0.97, respectively. The extracted phenotypes, including maize shoot coverage, circumscribed radius, aspect ratio, and plant azimuth plane angle, are highly correlated with manual measurements ( $R^2 = 0.96-0.99$ ). This approach requires less training data and thus has better expansibility. It provides practical means for high-throughput phenotyping analysis of early growth stage crop populations. |
| <b>Order of Authors:</b>                                                                                                                                                                                                                                                                                          | Yinglun Li<br>Weiliang Wen<br>Xinyu Guo<br>Zetao Yu<br>Shenghao Gu<br>Haipeng Yan<br>Chunjiang Zhao                                                                                                                                                                                                                                                                                                                                                                                                                                                                                                                                                                                                                                                                                                                                                                                                                                                                                                                                                                                                                                                                                                                                                                                                                                                                                                                                                                                                                                                                                           |
| <b>Additional Information:</b>                                                                                                                                                                                                                                                                                    |                                                                                                                                                                                                                                                                                                                                                                                                                                                                                                                                                                                                                                                                                                                                                                                                                                                                                                                                                                                                                                                                                                                                                                                                                                                                                                                                                                                                                                                                                                                                                                                               |
| <b>Question</b>                                                                                                                                                                                                                                                                                                   | <b>Response</b>                                                                                                                                                                                                                                                                                                                                                                                                                                                                                                                                                                                                                                                                                                                                                                                                                                                                                                                                                                                                                                                                                                                                                                                                                                                                                                                                                                                                                                                                                                                                                                               |
| <b>Financial Disclosure</b><br><br>Enter a financial disclosure statement that describes the sources of funding for the work included in this submission. Review the <a href="#">submission guidelines</a> for detailed requirements. View published research articles from <a href="#">PLOS ONE</a> for specific | This work was supported by Construction of Collaborative Innovation Center of Beijing Academy of Agricultural and Forestry Sciences (KJCX201917), the National Natural Science Foundation of China (31871519, 32071891), Reform and Development Project of Beijing Academy of agricultural and Forestry Sciences, China Agriculture Research System (CARS-02), and the Construction of Scientific Research and Innovation Platform in Beijing Academy of Agriculture and Forestry Sciences (PT2020-24).                                                                                                                                                                                                                                                                                                                                                                                                                                                                                                                                                                                                                                                                                                                                                                                                                                                                                                                                                                                                                                                                                       |

examples.

This statement is required for submission and **will appear in the published article** if the submission is accepted. Please make sure it is accurate.

#### Unfunded studies

Enter: *The author(s) received no specific funding for this work.*

#### Funded studies

Enter a statement with the following details:

- Initials of the authors who received each award
- Grant numbers awarded to each author
- The full name of each funder
- URL of each funder website
- Did the sponsors or funders play any role in the study design, data collection and analysis, decision to publish, or preparation of the manuscript?
- **NO** - Include this sentence at the end of your statement: *The funders had no role in study design, data collection and analysis, decision to publish, or preparation of the manuscript.*
- **YES** - Specify the role(s) played.

\* typeset

#### Competing Interests

Use the instructions below to enter a competing interest statement for this submission. On behalf of all authors, disclose any [competing interests](#) that could be perceived to bias this work—acknowledging all financial support and any other relevant financial or non-financial competing interests.

This statement **will appear in the published article** if the submission is accepted. Please make sure it is accurate. View published research articles from [PLOS ONE](#) for specific examples.

The authors have declared that no competing interests exist.

**NO authors have competing interests**

Enter: *The authors have declared that no competing interests exist.*

**Authors with competing interests**

Enter competing interest details beginning with this statement:

*I have read the journal's policy and the authors of this manuscript have the following competing interests: [insert competing interests here]*

\* typeset

**Ethics Statement**

N/A

Enter an ethics statement for this submission. This statement is required if the study involved:

- Human participants
- Human specimens or tissue
- Vertebrate animals or cephalopods
- Vertebrate embryos or tissues
- Field research

Write "N/A" if the submission does not require an ethics statement.

General guidance is provided below. Consult the [submission guidelines](#) for detailed instructions. **Make sure that all information entered here is included in the Methods section of the manuscript.**

**Format for specific study types**

**Human Subject Research (involving human participants and/or tissue)**

- Give the name of the institutional review board or ethics committee that approved the study
- Include the approval number and/or a statement indicating approval of this research
- Indicate the form of consent obtained (written/oral) or the reason that consent was not obtained (e.g. the data were analyzed anonymously)

**Animal Research (involving vertebrate animals, embryos or tissues)**

- Provide the name of the Institutional Animal Care and Use Committee (IACUC) or other relevant ethics board that reviewed the study protocol, and indicate whether they approved this research or granted a formal waiver of ethical approval
- Include an approval number if one was obtained
- If the study involved *non-human primates*, add *additional details* about animal welfare and steps taken to ameliorate suffering
- If anesthesia, euthanasia, or any kind of animal sacrifice is part of the study, include briefly which substances and/or methods were applied

**Field Research**

Include the following details if this study involves the collection of plant, animal, or other materials from a natural setting:

- Field permit number
- Name of the institution or relevant body that granted permission

**Data Availability**

Authors are required to make all data underlying the findings described fully available, without restriction, and from the time of publication. PLOS allows rare exceptions to address legal and ethical concerns. See the [PLOS Data Policy](#) and [FAQ](#) for detailed information.

Yes - all data are fully available without restriction

A Data Availability Statement describing where the data can be found is required at submission. Your answers to this question constitute the Data Availability Statement and **will be published in the article**, if accepted.

**Important:** Stating 'data available on request from the author' is not sufficient. If your data are only available upon request, select 'No' for the first question and explain your exceptional situation in the text box.

Do the authors confirm that all data underlying the findings described in their manuscript are fully available without restriction?

**Describe where the data may be found in full sentences. If you are copying our sample text, replace any instances of XXX with the appropriate details.**

- If the data are **held or will be held in a public repository**, include URLs, accession numbers or DOIs. If this information will only be available after acceptance, indicate this by ticking the box below. For example: *All XXX files are available from the XXX database (accession number(s) XXX, XXX).*
- If the data are all contained **within the manuscript and/or Supporting Information files**, enter the following:  
*All relevant data are within the manuscript and its Supporting Information files.*
- If neither of these applies but you are able to provide **details of access elsewhere**, with or without limitations, please do so. For example:

*Data cannot be shared publicly because of [XXX]. Data are available from the XXX Institutional Data Access / Ethics Committee (contact via XXX) for researchers who meet the criteria for access to confidential data.*

*The data underlying the results presented in the study are available from (include the name of the third party*

All relevant data are within the manuscript and its Supporting Information files

|                                                                                                                                                                                                                                         |                                                                                                                                     |
|-----------------------------------------------------------------------------------------------------------------------------------------------------------------------------------------------------------------------------------------|-------------------------------------------------------------------------------------------------------------------------------------|
| <p><i>and contact information or URL).</i></p> <ul style="list-style-type: none"><li>• This text is appropriate if the data are owned by a third party and authors do not have permission to share the data.</li></ul> <p>* typeset</p> |                                                                                                                                     |
| Additional data availability information:                                                                                                                                                                                               | Tick here if your circumstances are not covered by the questions above and you need the journal's help to make your data available. |

# 1 High-throughput phenotyping analysis of maize at the 2 seedling stage using end-to-end segmentation network

3 Yinglun Li<sup>1,2</sup>, Weiliang Wen<sup>2,3\*</sup>, Xinyu Guo<sup>2,3</sup>, Zetao Yu<sup>3</sup>, Shenghao Gu<sup>2,3</sup>, Haipeng

4 Yan<sup>4</sup> and Chunjiang Zhao<sup>1,2,3\*</sup>

5 <sup>1</sup> College of Resources and Environment, Jilin Agricultural University, Changchun  
6 130118, China

7 <sup>2</sup> Beijing Research Center for Information Technology in Agriculture, Beijing  
8 100097, China

9 <sup>3</sup> Beijing Key Lab of Digital Plant, National Engineering Research Center for  
10 Information Technology in Agriculture, Beijing 100097, China

11 <sup>4</sup> Beijing Shunxin Agricultural Science and Technology Co., Ltd, Beijing 100097,  
12 China

13 \* wlwen37@163.com(WW); zhaocj@nercita.org.cn(CZ)

## 14 Abstract

15 Image processing technologies are available for high-throughput acquisition and  
16 analysis of phenotypes for crop populations, which is of great significance for crop  
17 growth monitoring, evaluation of seedling condition, and cultivation management.  
18 However, existing methods rely on empirical segmentation thresholds, thus can have  
19 insufficient accuracy of extracted phenotypes. Taking maize as an example crop, we  
20 propose a phenotype extraction approach from top-view images at the seedling stage.  
21 An end-to-end segmentation network, named PlantU-net, which uses a small amount  
22 of training data, was explored to realize automatic segmentation of top-view images of  
23 a maize population at the seedling stage. Morphological and color related phenotypes  
24 were automatic extracted, including maize shoot coverage, circumscribed radius, aspect  
25 ratio, and plant azimuth plane angle. The results show that the approach can segment  
26 the shoots at the seedling stage from top-view images, obtained either from the UAV  
27 or ground high-throughput phenotyping platform. The average segmentation accuracy,  
28 recall rate, and F1 score are 0.96, 0.98, and 0.97, respectively. The extracted  
29 phenotypes, including maize shoot coverage, circumscribed radius, aspect ratio, and  
30 plant azimuth plane angle, are highly correlated with manual measurements ( $R^2=0.96-$   
31  $0.99$ ). This approach requires less training data and thus has better expansibility. It  
32 provides practical means for high-throughput phenotyping analysis of early growth  
33 stage crop populations.

34 **Keywords:** maize, deep learning, top-view, image segmentation, phenotype extraction  
35

---

36

## 37 Introduction

38 Recently, plant phenotyping has become a rapidly developing data-intensive  
39 discipline [1,2]. Studying the phenotypic information of plants under different  
40 environmental conditions provides insight into plant genetics [3,4] and is important  
41 identifying and evaluating the phenotypic differences of different cultivars [5]. Field  
42 phenotypes are the manifestation of crop growth under real conditions and are an  
43 important basis for genetic screening and the identification of mutations in field crops  
44 [6]. Therefore, it is important to conduct analyses of crop phenotypes under field  
45 conditions with high-precision. Traditionally, field phenotypic traits were obtained by  
46 manually measuring traits, which is work-intensive and time-consuming, limiting the  
47 number of measurable phenotypic traits. The development of information technology  
48 has made it possible to automatically acquire multi-source data of crops using high-  
49 throughput technology, such as images, point clouds, and spectrally collected data in  
50 the field, which can greatly reduce the manual labor and time commitment required to  
51 obtain crop phenotypic information. The cost of point cloud and spectral data  
52 acquisition sensors are more expensive than the image sensors; thus, image-based plant  
53 phenotyping has become a hot topic in agricultural research in recent years [7].

54 Unmanned aerial vehicles (UAVs), manned ground vehicles (MGVs), and tractor-  
55 based high-throughput phenotyping platforms (HTPPs) can rapidly obtain high-  
56 resolution top-view images of crop canopies. Researchers can extract phenotypic  
57 parameters [8], such as plant size [9], shape [10], and color [11], from the acquired  
58 images. For some specific phenotypic parameters, these approaches can be substituted  
59 for traditional manual measurements, improving the efficiency of collecting plant  
60 phenotypic information. However, different data collection methods and different  
61 environments can generate inconsistent image data. Thus, reliable automated methods  
62 are needed to extract accurate phenotypic information from large, complex datasets.  
63 Recently, researchers have proposed a variety of algorithms to address the above  
64 problems [12,13]; the basis of these algorithms is image segmentation.

65 Accurate and efficient field crop image segmentation methods can rapidly and  
66 accurately obtain crop phenotypic traits. Researchers have conducted numerous studies  
67 on the image segmentation of crops under field conditions [15,16]. Early field crop  
68 image segmentation methods can be roughly divided into four categories: shape  
69 constraints [17], edge detection [18], deep information integration [19], and machine  
70 learning methods [20]. These studies can address issues in the field, such as disease  
71 identification [21,22], environmental stress [23], chlorophyll diagnosis [24], and  
72 phenotypic extraction [25], at the individual plant or population scale. However, the  
73 background of the plant images in these methods was manually constructed or relatively  
74 simple. In addition, these methods typically have strict requirements on the light  
75 intensity of the input images.

76 With its powerful feature extraction capabilities, deep learning technology is a



77 turning point for accurately and rapidly addressing image segmentation problems  
78 [26,27]. Fully trained models can achieve accurate image segmentation for regions of  
79 interest (ROI). Currently, popular deep neural network processing methods use center  
80 point detection [28]. Alternately, deep neural network processing methods directly  
81 perform leaf edge detection [29] to achieve image segmentation and whole or partial  
82 segmentation of images of plants collected under field [26] or indoor [30] conditions.  
83 Segmentation results are used to extract crop features [31], as well as quantify [30,32],  
84 count [11], and estimate diseases [33,34]. Deep learning has advantages in collaborative  
85 applications such as the interactions between genotype and environment. Compared  
86 with classical methods, deep learning technology does not rely on manual filters and  
87 feature annotations; instead, it learns the best representation of the data, allowing it to  
88 perform better in scenarios where the amount of data is sufficient.

89 Researchers have applied advanced hardware facilities and intelligent data  
90 processing methods to research plant phenotypes. However, accurate extraction of fine-  
91 scale phenotypic information of individual plants is still difficult under field conditions  
92 because of the occlusion and crossover that occurs in the later growth stages of crops.  
93 In a field maize population, for example, leaves of adjacent shoots appear cross-shaded  
94 after ridging, which makes it difficult to completely and precisely extract the  
95 phenotypes of individual plants within a population. Therefore, obtaining and resolving  
96 phenotypic traits of maize shoots at the seedling stage is a better way to characterize  
97 the phenotypic traits of individual plants, and can guide the structural-functional  
98 analysis of maize populations in later growth stages. For example, phenotypic traits at  
99 the seedling stage provide reference information, such as growth position, direction,  
100 and growth potential, for each shoot within the population.

101 In this paper, a full convolutional neural network based end-to-end image  
102 segmentation approach of maize population at the seedling stage, named PlantU-net, is  
103 proposed. Using this approach, each shoot within the population image is precisely  
104 localized and the phenotypes are extracted. The approach is expected to provide  
105 technical support for image processing and high-throughput phenotype extraction from  
106 the top-view images acquired by UAVs and field phenotyping platforms.

## 107 **Materials and Methods**

### 108 **Data Acquisition**

109 Data for PlantU-net model training and inbred line population analysis were  
110 obtained at the experimental field, Beijing Academy of Agriculture and Forestry  
111 Sciences, Beijing, China (39°56' N, 116°16' E). A population used for correlation  
112 analysis with 502 cultivars [36] was planted in the field on May 17, 2019. The row and  
113 plant spacing were 60 and 27.8 cm, respectively. The planted cultivars can be divided

114 into four subpopulations [36]: hard stalks (SS), non-hard stalks (NSS), tropical and  
115 subtropical (TST), and mixed inbred lines (Mixed), with 32, 139, 221, and 110 cultivars  
116 for each subpopulation. Top-view images of shoots were obtained 12 (V3) and 26 (V6)  
117 days after sowing. Images were acquired using an EOS5DIII digital camera with a 24–  
118 70 mm lens vertically downward mounted on a SLR tripod (height 1.7 m, as shown in  
119 Figure 1a), with each image containing approximately five to six plants. Size-known  
120 markers are placed in the original image to provide a scale reference for later image  
121 cropping and scaling. When acquiring the images, the experimenter faced to east,  
122 ensuring that the left side of the captured images was oriented to the north. Image  
123 acquisition occurred over three days (one day for V3; two days for V6): one sunny day  
124 for V3, and one sunny and one cloudy day for V6. The incident light angle and the  
125 intensity differed over the course of data acquisition. Drip irrigation belts were arranged  
126 to ensure adequate water and fertilizer. Consequently, these changes in the background  
127 cause challenges for later image processing. Top-view images of maize populations at  
128 the seedling stage were obtained using UAV and a field phenotyping platform.

129 The experimental plots of the field phenotyping platform were adjacent to the plots  
130 obtained from the above-mentioned model dataset and managed in the same manner.  
131 Thirteen maize hybrids were planted within the coverage of the platform on May 25,  
132 2019; this included one row of each hybrid, with 1.5 m long rows and 60 cm row  
133 spacing. The platform's image acquisition system consisted of a stable imaging chamber  
134 and a Hikari MV-CA060-10GC color camera. The camera lens was 2.5 m above the  
135 ground, and the resolution of the captured images was  $3072 \times 2048$  pixels. In the  
136 process of data acquisition, the imaging chamber was equipped with a lens that moved  
137 in an S-shaped trajectory above the experimental plot, and the acquired images were  
138 stitched together to obtain a complete top-view image of the plot. The data acquisition  
139 of the ground phenotyping platform is shown in Figure 1b. The image acquired on the  
140 17th day after sowing was selected for subsequent phenotypic analysis.

141 The experiment of top-view image data acquisition using UAV of maize  
142 populations at the seedling stage was carried out at the Tongzhou Experimental Field,  
143 Beijing Academy of Agricultural and Forestry Sciences ( $39^{\circ}70' \text{ N}$ ,  $116^{\circ}68' \text{ E}$ ). One  
144 hybrid of maize was grown on April 28, 2019 and planted in rows 2.1 m long and 60  
145 cm apart. A visible light sensor was mounted on a UAV and image data was acquired  
146 20 days after sowing. The image capture system consisted of a 1-inch CMOS HD  
147 camera and an engineering-specific gimbal. The UAV flew at an altitude of 30 m, and  
148 the resolution of the captured images was  $4000 \times 3000$  pixels. The data acquisition  
149 process is shown in Figure 1c.

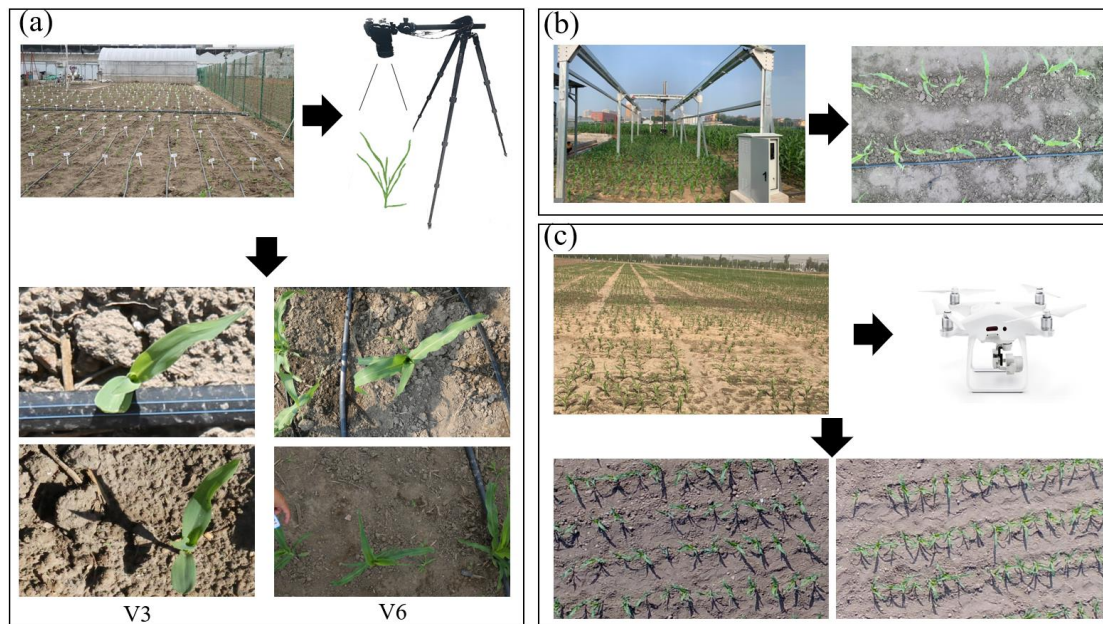

150

151

152

153

154

**Figure 1. The set up for acquiring the photographs and examples of acquired images.** This includes acquisition of top-view images using a tripod camera system (a), ground high-throughput phenotyping platform (b), and UAV platform (c).

155

## Data Preparation

156

157

158

159

160

161

162

163

164

165

166

167

168

169

170

171

172

Datasets with annotated images are necessary for robust image segmentation models. In practice, this dataset was constructed using the top-view images obtained at two periods, V3 and V6 (Figure 1a). Because the soil background accounts for a large proportion of the raw images, the images were cropped around the area containing the plants and the images were scaled to  $256 \times 256$  pixels for further training the model. A total of 192 images, containing seedling maize shoots, were annotated using LabelMe software. Among the total number of images, 128 images were expanded into 512 images to use as a training set after mirror symmetry, translation, and rotation. The remaining 64 labeled images were used to form a validation set to determine the criteria that may prevent network training. To prevent overfitting, the network will train until the losses on the validation set are stable. The model designed in this study is a small sample learning model, and data augmentation was adopted to ensure the quality of the training set, which will be discussed later. There are 200 images in the testing set, which were randomly selected from the four maize subpopulations described in the experiment in Figure 1a. Here, images of 50 hybrids belonging to each subpopulation were randomly selected (subpopulation SS consisted of only 32 hybrids, so there are 18 duplicated hybrid images belonging to the SS subpopulation in the test set).

## 173 PlantU-net Segmentation Network

174 To accurately segment maize shoots at the seedling stage in field conditions from  
175 the top-view image, the shoots were segmented as the foreground and output as a binary  
176 image. However, top-view images of field maize are relatively complex with stochastic  
177 background and uneven light conditions. Consequently, existing models are not  
178 satisfactory to extract pixel features. To address this issue, we built a PlantU-net  
179 segmentation network by adjusting the model structure and key functions of U-net [37],  
180 which improves the segmentation accuracy of images taken under a complex  
181 environment.

### 182 Model Structure

183 PlantU-net is a network designed for the segmentation of top-view images of crops  
184 grown in the field. A full convolution network is adopted to extract hierarchical features  
185 via an “end-to-end” process. As shown in Figure 2, the feature contraction path is  
186 composed of three layer downsampling modules, each module uses a  $3 \times 3$  convolution  
187 to extract one row feature, and a  $2 \times 2$  pooling operation to reduce the spatial  
188 dimensionality. Two convolution operations are conducted after downsampling to  
189 adjust the input size of the extended path. Corresponding to the contracted path, the  
190 extended path includes three layer upsampling modules. In each upsampling module, a  
191  $2 \times 2$  up sampling convolution is first performed to expand the spatial dimension. Then  
192 the upsampled results are fused with the low-level feature maps in the corresponding  
193 contracted path to connect contextual information across adjacent levels. Two  
194 convolution operations are performed during the upsampling process to reduce the  
195 feature dimension and facilitate feature fusion. After upsampling, a  $1 \times 1$  convolution  
196 is performed as the full connection layer to output the segmented image. The same  
197 padding is filled in the samples during the convolution operations, which facilitates the  
198 computation. The parameters used for each layer of the model are shown in Table 1.

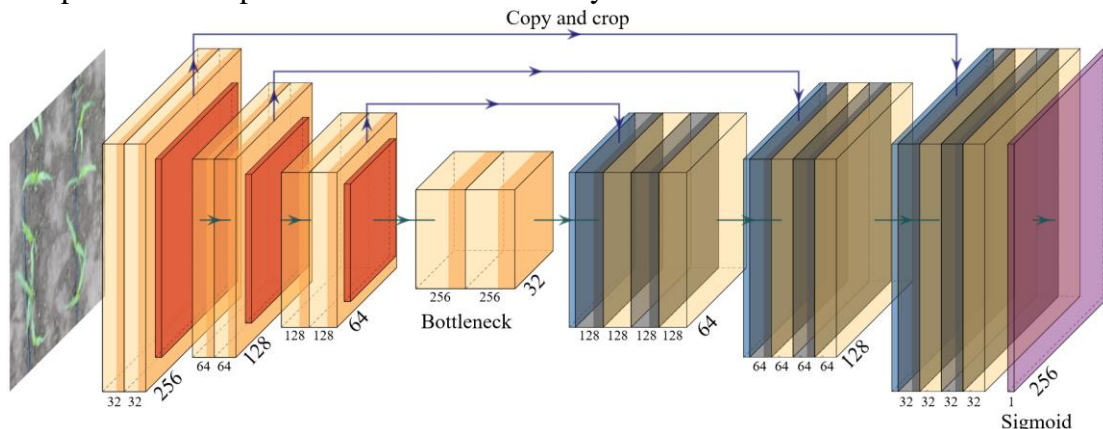

199

200 **Figure 2. Architecture of the PlantU-net network.** The input is a  
201  $256 \times 256 \times 3$  image. The hidden layer of the network includes downsampling  
202 (left) and upsampling stages (right). Both stages comprise convolution (Conv),

203 activation (Leaky ReLU), and max pooling operations. The output is a  $256 \times$   
 204  $256 \times 1$  segmented image.

205 **Table1. Configuration of the model structure parameters.** Refer to Figure  
 206 3 for the architecture of the PlantU-net network.

| Layers                   | Input                      | Convolution filter                             | Output                     |
|--------------------------|----------------------------|------------------------------------------------|----------------------------|
| Downsampling module 1    | $256 \times 256 \times 3$  | $3 \times 3 \times 32$                         | $128 \times 128 \times 32$ |
| Downsampling module 2    | $128 \times 128 \times 32$ | $3 \times 3 \times 64$                         | $64 \times 64 \times 64$   |
| Downsampling module 3    | $64 \times 64 \times 64$   | $3 \times 3 \times 128$                        | $32 \times 32 \times 128$  |
| Convolution module       | $32 \times 32 \times 128$  | $3 \times 3 \times 256, 3 \times 3 \times 128$ | $32 \times 32 \times 128$  |
| Upsampling module 1      | $32 \times 32 \times 128$  | $3 \times 3 \times 128, 3 \times 3 \times 64$  | $64 \times 64 \times 64$   |
| Upsampling module 2      | $64 \times 64 \times 64$   | $3 \times 3 \times 64, 3 \times 3 \times 32$   | $128 \times 128 \times 32$ |
| Upsampling module 3      | $128 \times 128 \times 32$ | $3 \times 3 \times 32$                         | $256 \times 256 \times 32$ |
| Convolution $1 \times 1$ | $256 \times 256 \times 32$ | $3 \times 3 \times 1$                          | $256 \times 256 \times 1$  |

207 To a certain extent, the network parameters of the model are reduced to ease the  
 208 burden of computers, and also to reduce the training time while ensuring the  
 209 segmentation effect. Since the number of training samples is small, a dropout layer is  
 210 appropriately added to prevent overfitting. In addition, to identify and utilize edge  
 211 features, a maximum pooling layer is adopted for downsampling.

## 212 Main Functions

### 213 Activation Function

214 The activation function in deep learning incorporates nonlinear factors to solve the  
 215 linear classification problem. In PlantU-net, Leaky ReLU is used as the activation  
 216 function. It still has an output when the input is negative, which eliminates the neuron  
 217 inactivation problem in back propagation. The expression is:

$$f(x) = \begin{cases} x & \text{if } x \geq 0 \\ \theta x & \text{if } x < 0 \end{cases} \quad (1)$$

218 For the final output layer of the model, Sigmoid is used as the activation function  
 219 for biclass. Sigmoid is capable of mapping a real number to an interval of (0, 1), and is  
 220 applicable for biclassing. Its expression is:

$$S(x) = \frac{1}{1 + e^{-x}} \quad (2)$$

### 221 Loss Function

222 The loss of function in the U-net model is replaced by the binary-cross-entropy  
 223 function in the PlantU-net model. The binary-cross-entropy function is a cross-entropy  
 224 of two-class classifications, which is a special case of the entropy function. The binary  
 225 classification is a logistic regression problem and the loss function of the logistic



226 regression can also be applied. Considering the output of the last layer of the sigmoid  
227 function, this function is selected as the loss function. The mathematical expression of  
228 binary-cross-entropy function is:

$$L = -[y \log y' + (1 - y) \log(1 - y')] \quad (3)$$

229 where  $y$  is the true value and  $y'$  is an estimation when  $y = 1$ .

$$L = -\log y' \quad (4)$$

230 The output of this loss of function is smaller when the estimated value is closer to  
231 0, and the output value of the loss of function is larger when it is closer to 1. This is  
232 suitable for the binary classification output of the last layer in this network.

## 233 **Network Training**

234 The PlantU-net was trained using the Keras framework (Figure 1) with  
235 acceleration from GPUs (NVIDIA Quadro P6000). Five hundred and twelve images  
236 were used to train the model. Data expansion is the key to making the network have the  
237 required invariance and robustness because this model uses a small number of samples  
238 for training. For top-view images of maize shoots, PlantU-net needs to meet the  
239 robustness of plant morphology changes and value changes of gray images. Increasing  
240 the random elastic deformation of training samples is the key to training segmentation  
241 networks with a small number of labeled images. Therefore, during the data reading  
242 phase, PlantU-net uses a random displacement vector on the  $3 \times 3$  grid to generate a  
243 smooth deformation, where the displacement comes from a Gaussian distribution with  
244 a standard deviation of 10 pixels. Because the number of training samples is small, the  
245 dropout layer is added to prevent the network from overfitting. Through these "data  
246 enhancement" methods, the model performance is improved and overfitting is avoided.  
247 In each epoch, the batch size was 1, the initial learning rate was 0.0001, and adam is  
248 used as an optimizer to quickly converge the model. PlantU-net was trained until the  
249 model converged (the training loss was satisfied and remained nearly unchanged).

## 250 **Evaluation of segmentation accuracy**

251 Because the segmentation of the top-view images of maize shoots using the  
252 PlantU-net model is considered a binary classification problem, when evaluating the  
253 segmentation results, the classification results of predicted output and ground truth  
254 (GT) data can be used to perform pixel-level comparisons. If the pixel in the leaves is  
255 marked as 1, and in the segmented image, the corresponding pixel is still 1, then it is  
256 judged as true positive (TP); if the pixel point is judged as 0 after segmentation, the  
257 pixel is judged as false positive (FP). Similarly, when the pixel in the original image  
258 does not belong to the maize leaf, it is marked 0, if such pixel is judged as 1 after  
259 segmentation, it is a false negative (FN); if such a pixel is also judged as 0, then it is a

260 true negative (TN). Following these rules, four indicators for evaluation [39] were used  
261 in this study: 

262 **(1) Precision.** Precision represents the proportion of true positive samples among those  
263 predicted to be positive and is defined as:

$$P = \frac{TP}{TP + FP} \quad (5)$$

264 **(2) Recall.** Recall indicates how many positive samples of the total sample are correctly  
265 predicted and is defined as:

$$R = \frac{TP}{TP + FN} \quad (6)$$

266 **(3) F1-Score.** After calculating the accuracy and recall, the F1-Score can be calculated,  
267 which represents the weighted harmonic average of accuracy and recall. It is used for  
268 standardized measurement and is defined as:

$$F1 \text{ Score} = \frac{2PR}{P + R} \quad (7)$$

269 **(4) DICE.** Several metrics are commonly used to evaluate the segmentation results.  
270 Here,  $R_{seg}$  is used to present the predicted results, and  $R_{gt}$  represents the manually  
271 segmented ground truth data. Then DICE ( $\in[0,1]$ ) is defined as:

$$DICE = \frac{2(R_{seg} + R_{gt})}{R_{seg} + R_{gt}} \quad (8)$$

272 DICE represents the ratio of the coincidence area between the segmentation results  
273 and the ground truth data to the total area. The value for perfect segmentation is 1.

## 274 **Extraction of Phenotypic Parameters**

275 The phenotypic traits concerning the shape and color characteristics of each shoot  
276 were estimated using PlantU-net based on the top-view images of the segmented maize  
277 shoots. The segmented images may still contain multiple maize plants. The phenotypic  
278 parameter extraction process will start with edge detection based on the segmentation  
279 results, connective domain markers based on the edge detection results, and finally  
280 single-plant phenotypic parameter extraction based on these connective domain  
281 markers.

## 282 **Morphological feature extraction**

283 The description of morphological features can be divided into two categories. The  
284 first category is the outline-based shape description, which focuses on describing the  
285 outline of the target area. The other category is the area-based shape description, which  
286 describes the target by area, geometric moment, eccentricity, and region shape. In this  
287 study, the center point (Figure 3b) and contour (Figure 3c) of a maize shoot were first  
288 extracted from the segmented image. The minimum circumscribed radius (Figure 3d)

289 and aspect ratio (Figure 3e) of the plant were then calculated based on the extracted  
290 contour. The coverage and plant azimuth plane were obtained based on the target region  
291 in the segmented images as described below.

292 (1) The circumcircle radius ( $r$ ) is half of the distance between the two pixels with the  
293 furthest outline of the plant (Figure 3d):

$$r = \frac{\max[\text{dis}(C_i, C_j)]}{2} \quad (9)$$

294 where  $C_i, C_j$  represent two pixels that are the furthest apart on the outline of the plant.

295 (2) The aspect ratio ( $A$ ) is the ratio of the length to width in the minimum bounding box  
296 of the plant (Figure 3e):

$$A = \frac{L}{H} \quad (10)$$

297 where  $L$  is the length in the  $x$  direction of the smallest bounding box and  $H$  is the length  
298 in the  $y$  direction. The smallest bounding box refers to the smallest rectangle among the  
299  $n$  rectangles that can include the target plant area.

300 (3) The segmented results are binary images; thus, the maize shoot coverage ( $C$ ) is  
301 calculated by counting the total number of pixels occupied by the target area:

$$C = \sum_{x=0}^{m-1} \sum_{y=0}^{n-1} f(x, y) \quad (11)$$

302 where  $f(x, y)$  represents the binary map,  $m$  is the maximum number of pixels in  
303 the  $x$ -axis direction, and  $k$  is the maximum number of pixels in the  $y$ -axis direction.  
304 Regarding the binary maps, pixels of the target plant are always labeled by 1, whereas  
305 the background pixels are labeled using 0 for the output; therefore, the pixel method of  
306 calculation was used, meaning that pixels were counted as  $f(x, y) = 1$  pixels.  
307 Calibration objects were used in the original image of the dataset. The length and width  
308 of the cropped image can be calculated using the calibration objects because the image  
309 size was cropped to  $256 \times 256$ . The area of each pixel was calculated according to the  
310 length and width of the image, and the size of the maize plant in the image was obtained  
311 by multiplying the total number of pixels in the segmented target area.

312 (4) Studies have shown that expanded leaves of maize shoots are distributed along a  
313 vertical plane, which is the plant azimuth plane [40,41]. The original images for this  
314 study were oriented eastward during the data acquisition process; thus, the left side of  
315 the image in the dataset indicates the north. In the Figure 3f, the blue line indicates a  
316 single maize plant after segmentation and shows a north–south orientation. A red line  
317 was fitted by clustering in the leaf section (or tangent to it if the clustering result is a  
318 curve) as the plant azimuthal plane. The angle between the red line and the blue line  
319 was calculated as  $\beta$ , which was used as the azimuthal plane angle of the plant. The  
320 specific morphological features were extracted as shown in Figure 3.



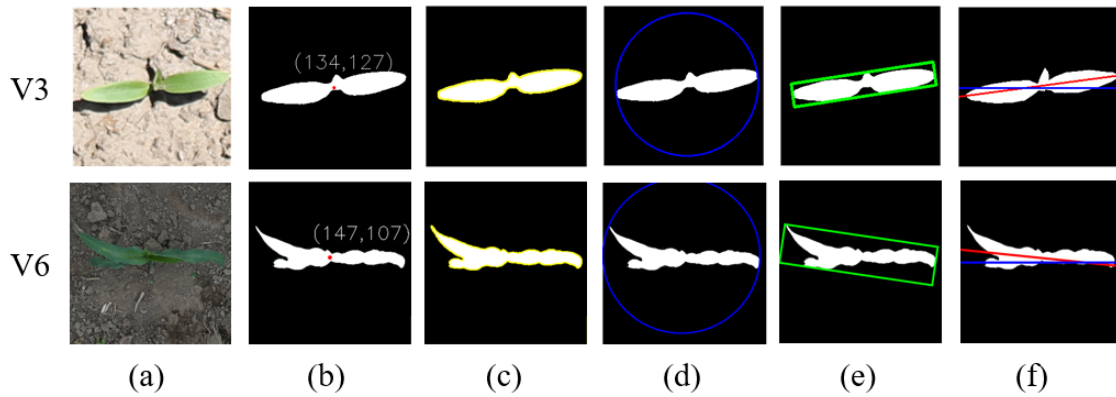

321

322 **Figure 3. Illustration of phenotype extraction based on the image**  
 323 **segmentation results of V3 and V6 growth stages, respectively.** (a) The  
 324 original image. (b) Coordination of the extracted center point. (c) Outline of  
 325 the plant. (d) Minimum circumscribed circle. (e) Minimum bounding box. (f)  
 326 Angle between the plant azimuth plane and the north. The red line represents  
 327 the fitted azimuth plane and the blue line indicates the north–south direction.  
 328  $\beta$  is the angle between the red line and the blue line, and the value is between  
 329 0 and 180°. The angle  $\beta$  between the red and blue lines was estimated and used  
 330 to represent the angle of the plant azimuthal plane (Figure 3f).

### 331 Extraction of color features

332 Maize leaf color has a direct relationship with moisture, nutrients, and disease, so  
 333 color characteristics are an important parameter for plant phenotyping [41]. The pixels  
 334 in the image are composed of red (R), green (G), and blue (B) values. By aligning the  
 335 segmented image as a region of interest (MASK) with the original image, the RGB  
 336 parameters of the color features of the MASK region can be extracted, which can further  
 337 be transformed into HSV color space parameters [42]. This approach was primarily  
 338 used because the HSV model is similar to the color perception by the human eye, and  
 339 the HSV model can reduce the effect of light intensity changes on color discrimination.  
 340 Therefore, the parameters of the color phenotypes in this study are represented using  
 341 the mean of the RGB or HSV parameters.

### 342 Statistical analysis

343 The phenotypic traits extracted from segmentation results were compared with a  
 344 manually measured value. The measured value of the circumcircle radius, aspect ratio,  
 345 and plant azimuth plane was manually measured from the results by segmentation.  
 346 Maize shoot coverage compared the segmentation results of PlantU-net with the results  
 347 of manual segmentation. The adjusted coefficient of determination ( $R^2$ ) and  
 348 normalization root-mean-squared error (NRMSE) were calculated to assess the  
 349 accuracy of these extracted parameters. The equations were as follows:

$$R^2 = 1 - \frac{\sum_{i=1}^N (v_i - v'_i)}{\sum_{i=1}^N (v_i - \hat{v}_i)^2} \quad (12)$$

$$NRMSE = \frac{\sqrt{\frac{1}{n} \sum_{i=1}^N (v_i - v'_i)^2}}{\hat{v}_i} \quad (13)$$

350 where n is the numbers of objects,  $v_i$  is the results of manual segmentation,  $v'_i$  is the  
 351 value of PlantU-net, and  $\hat{v}_i$  is the mean value of the results of manual segmentation.

352 In the phenotypic analysis of the four subpopulations, this study analyzed the  
 353 phenotypic trait data extracted from the test set. Box plots were drawn using Python.  
 354 The extracted phenotypic trait data was marked in Excel and Python was used to write  
 355 a program to read the data. The data was then visualized by calling the Matplotlib  
 356 development library in Python.

## 357 Results

### 358 Model Segmentation Effect

359 The PlantU-net segmented network has been trained many times. During the  
 360 training process, each epoch contained 200 batches with the size of 1, and the final  
 361 training loss was shown in Figure 4. Training losses declined quickly in the first 100  
 362 batches (Figure 4), and then became slower. The loss for the final partition is 0.003.  
 363 The model was trained on a workstation (2 Intel Xeon (R) Gold 6148 CPU, 256 GB  
 364 RAM and NVIDIA Quadro P6000 GPU) for 41 minutes.

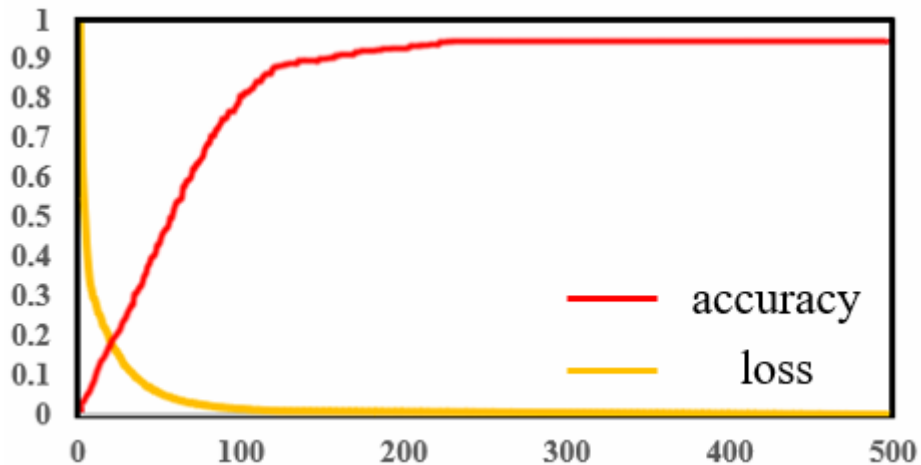

365  
 366 **Figure 4. Training loss curve within 500 epochs and prediction precision**

367 To show the image segmentation of the PlantU-net model of a single maize plant,  
 368 the dataset and training parameters used by the PlantU-net model were imported into  
 369 the U-net model for training, and the segmentation results of the two methods were  
 370 compared with the manual segmentation results (Figure 5). The segmentation of the  
 371 PlantU-net model is better than that of the U-net model. PlantU-net has a more complete

372 edge detection of segmentation results, and the precision of pixel classification of the  
 373 interested regions is higher.

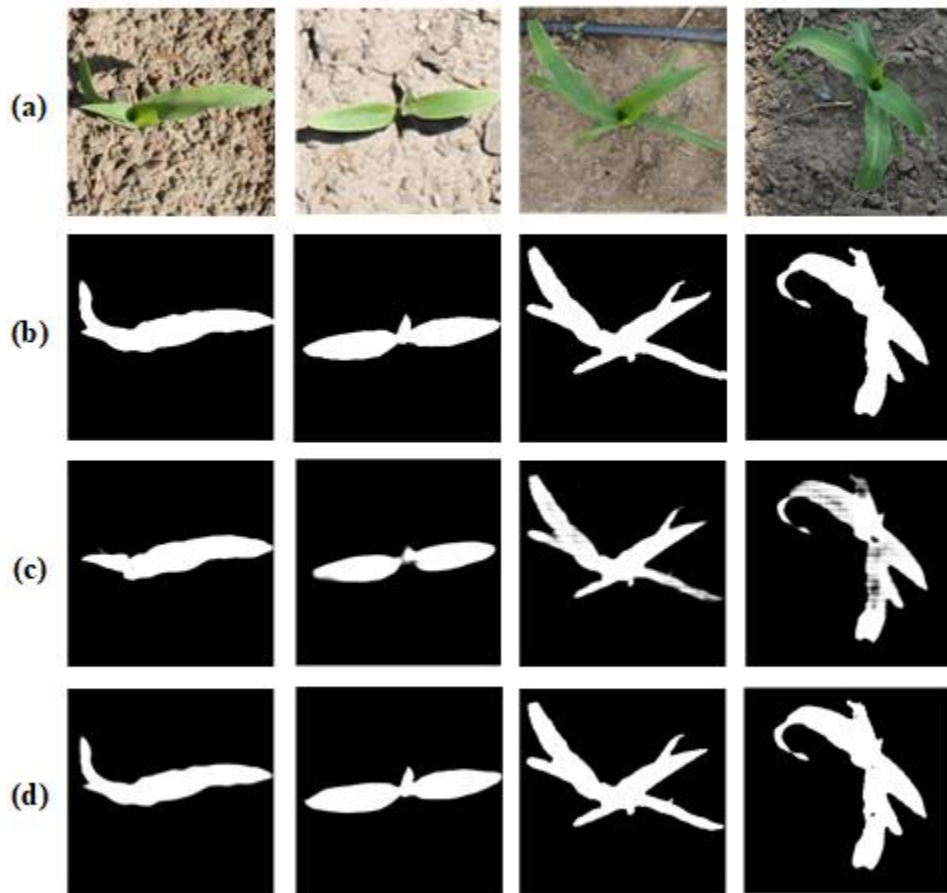

374

375 **Figure 5. Result of model segmentation**, in which (a) is the original image,  
 376 (b) is the ground truth by manual segmentation, (c) is the result obtained using  
 377 the U-net model, and (d) is the result obtained using the PlantU-net model.

378 **Table 2. Comparisons of the segmentation results of the U-net model and**  
 379 **the PlantU-net model using the data obtained from the validation set (V)**  
 380 **and test set (T).**

| Segmentatio<br>n method | Training<br>time/M | Precision |      | Recall |      | F1-Score |      | DICE |      |
|-------------------------|--------------------|-----------|------|--------|------|----------|------|------|------|
|                         |                    | V         | T    | V      | T    | V        | T    | V    | T    |
| U-net                   | 52                 | 0.87      | 0.86 | 0.86   | 0.90 | 0.86     | 0.88 | 0.87 | 0.86 |
| PlantU-net              | 41                 | 0.95      | 0.96 | 0.98   | 0.98 | 0.96     | 0.97 | 0.96 | 0.97 |

381 Table 2 compares the training time and segmentation results obtained using the  
 382 PlantU-net and U-net models. The segmentation precision of the PlantU-net model is  
 383 significantly higher than that of the U-net model, and less training time is required. In  
 384 the segmentation results of the PlantU-net model, the values of the verification set and  
 385 test set are similar. The PlantU-net model in the test set has a good segmentation effect,  
 386 with the precision (P) of the segmentation results reaching 0.96, recall rate (R) reaching  
 387 0.98, and F1-score reaching 0.97.

## 388 Individual Plant Scale Phenotypic Parameter Extraction

389 Using the PlantU-net model and the phenotype extraction method, the coverage,  
390 circumscribed radius, aspect ratio, and plant azimuth plane were determined using the  
391 validation dataset, and the measured data were compared with the extracted results for  
392 verification (Figure 6). Among them, the correlation coefficient  $R^2$  of the artificial  
393 segmentation results and the automatic extraction results of the four morphological  
394 phenotypic parameters were all greater than 0.96, and the NRMSE values were all less  
395 than 10%, indicative of the reliability of the PlantU-net segmentation model and the  
396 phenotype extraction method.

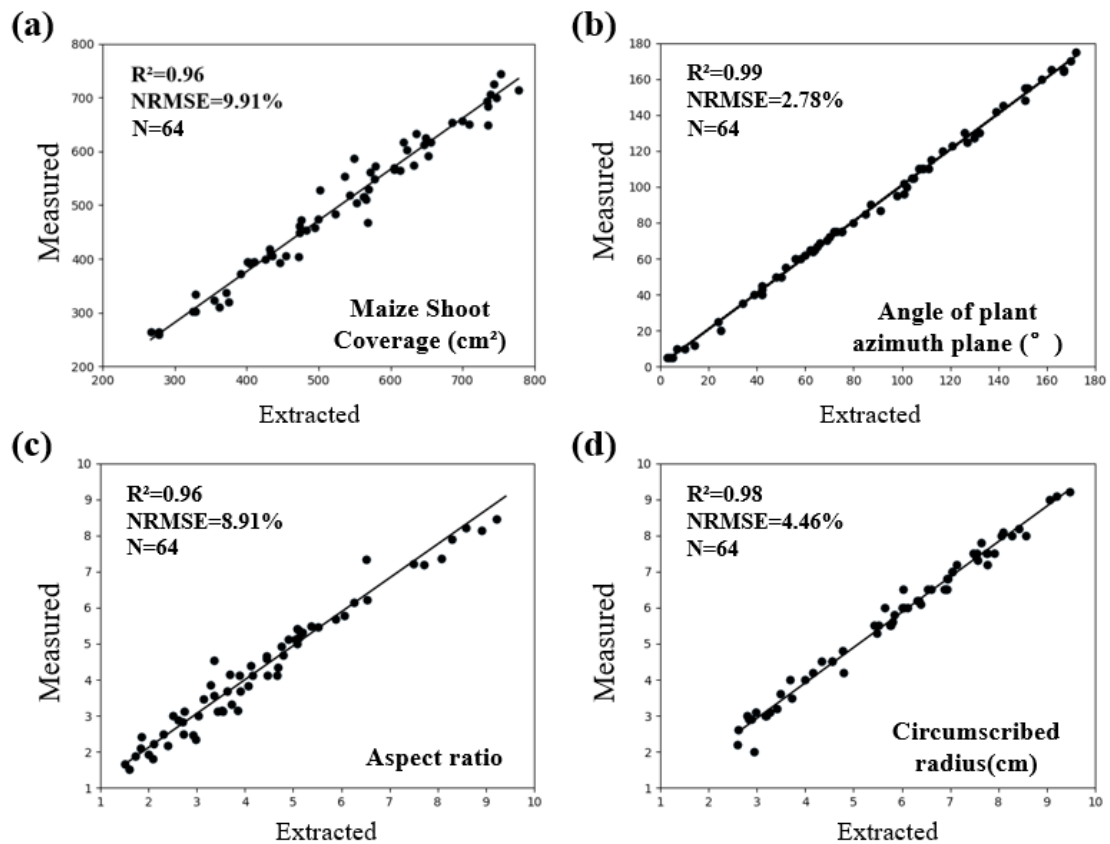

397

398 **Figure 6. Correlation analysis between phenotypic measurements and**  
399 **manual measurements in top-view segmentation results of field maize. (a)**  
400 **Coverage, (b) the angle of plant azimuth plane, (c) aspect ratio, and (d)**  
401 **circumscribed radius**

## 402 Population Scale Phenotypic Parameter Extraction

403 To evaluate the performance of the PlantU-net model in the image segmentation  
404 and phenotypic parameter extraction of the maize population, the field high-throughput  
405 phenotypic platform and the top-view of maize seedlings obtained by UAV were  
406 selected as inputs. The top-view images were obtained using both the field ground



407 phenotypic platform and UAV. Figure 7 shows the segmentation results and schematic  
408 diagram of phenotypic parameter extraction of the PlantU-net model applied to two  
409 sample plots.

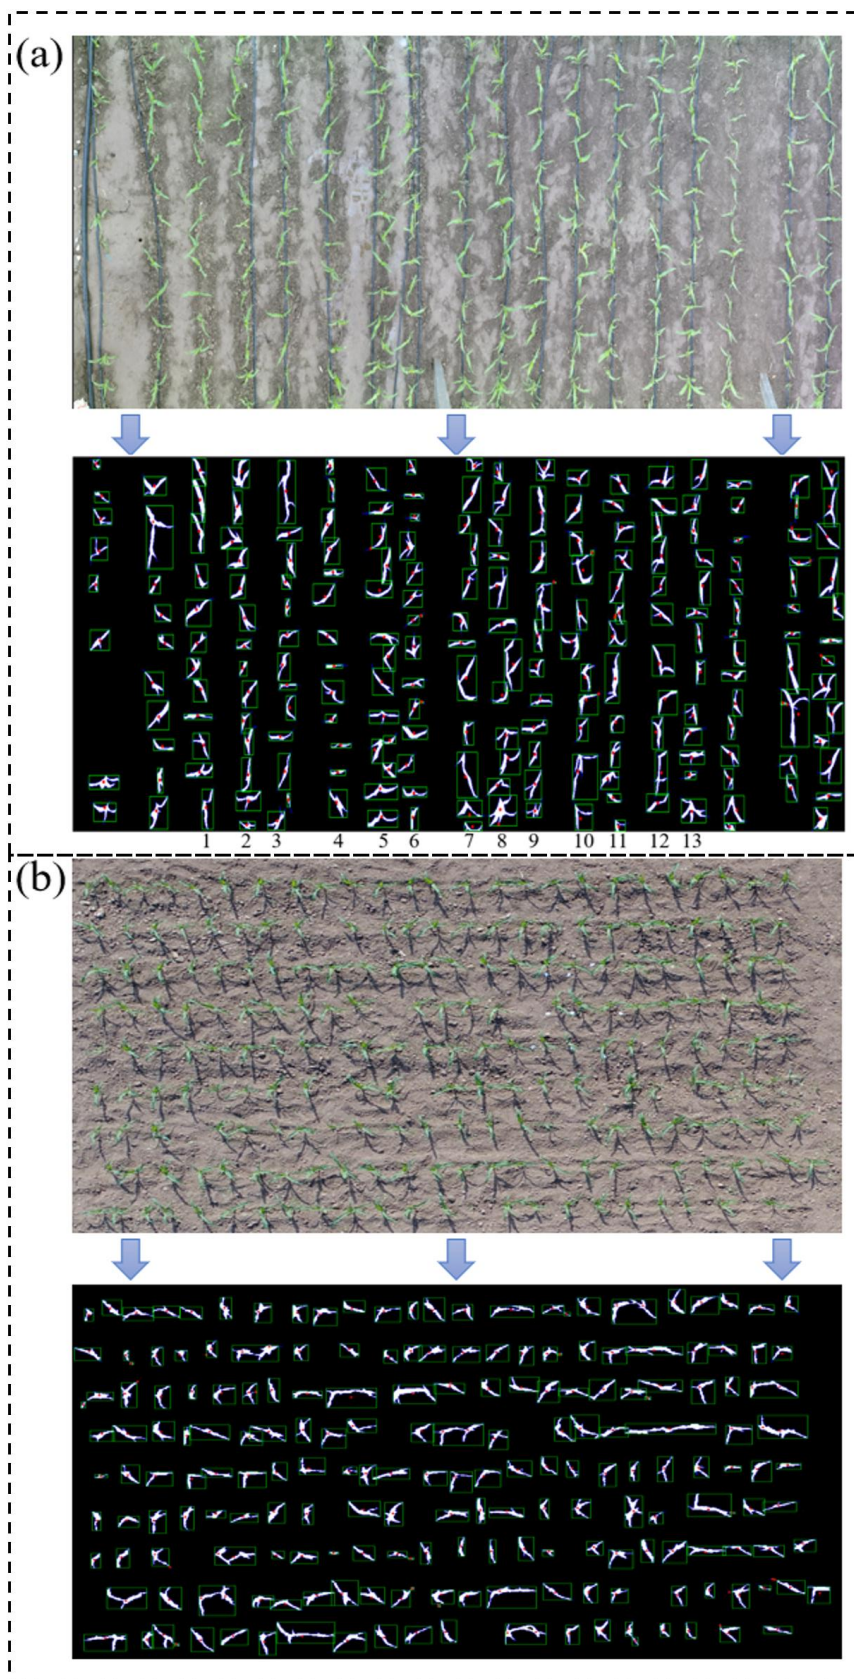

411 **Figure 7. Schematic diagram of the segmentation and phenotype**  
 412 **extraction of the top-view of maize seedlings obtained using the field**  
 413 **ground phenotyping platform and UAV.** In (a), a field track phenotypic  
 414 platform was used to obtain the top-view images. In addition to the protected  
 415 rows, a total of 13 varieties of maize plants were included (marked with a serial  
 416 number in the figure). (b) For the top-view of the maize population obtained  
 417 using the UAV, the image contains 216 maize plants of the same cultivar.

418 Phenotypic parameters were extracted from the segmentation results of two  
 419 sample plots using the above methods. The mean value and standard deviation of  
 420 various morphological parameters of the same cultivar of maize are shown in Table 3.  
 421 The mean value can be used to quantify the growth potential of different maize cultivars  
 422 in the same growth period, while the standard deviation can be used to evaluate the  
 423 consistency of plant growth within the same maize cultivar. Therefore, this method can  
 424 provide techniques for quantitative evaluation of plant growth potential, allowing for  
 425 phenotypic analysis of the top-view of a maize population at the seedling stage obtained  
 426 using multiple high-throughput phenotyping platforms in the field.

427 **Table 3. Morphological parameters of different maize cultivars.** AD268-  
 428 M751 in the table corresponds to 1–13 in figure 7A from top to bottom, and  
 429 the bottom row of the data is obtained from the phenotypic parameters of  
 430 maize plants in the image obtained by UAV.

| Cultivar | Coverage (cm <sup>2</sup> ) |       | Aspect ratio |      | Circumscribed radius (cm) |      | Angle of plant azimuth plane (°) |       |
|----------|-----------------------------|-------|--------------|------|---------------------------|------|----------------------------------|-------|
|          | AVG                         | STD   | AVG          | STD  | AVG                       | STD  | AVG                              | STD   |
| AD268    | 132.23                      | 42.28 | 5.73         | 2.34 | 9.88                      | 1.92 | 101.00                           | 53.11 |
| MC670    | 150.44                      | 45.41 | 4.13         | 2.08 | 10.73                     | 2.21 | 85.30                            | 45.68 |
| JNK2010  | 130.55                      | 42.75 | 5.49         | 1.40 | 10.69                     | 1.67 | 97.40                            | 49.95 |
| JNK728   | 120.08                      | 34.45 | 3.53         | 1.00 | 10.27                     | 2.08 | 99.90                            | 37.42 |
| NK815    | 117.45                      | 50.69 | 5.30         | 2.60 | 9.03                      | 1.64 | 87.90                            | 55.44 |
| JKQC516  | 120.28                      | 42.96 | 5.58         | 2.26 | 10.58                     | 1.75 | 81.20                            | 54.08 |
| SK567    | 119.87                      | 53.66 | 5.54         | 2.58 | 9.23                      | 1.29 | 74.90                            | 51.28 |
| Y968     | 116.10                      | 43.79 | 5.08         | 2.38 | 11.05                     | 2.48 | 64.00                            | 42.44 |
| MC141    | 119.04                      | 38.42 | 6.07         | 2.01 | 10.79                     | 1.71 | 101.90                           | 59.28 |
| ZD958    | 103.31                      | 45.97 | 6.17         | 1.94 | 11.13                     | 2.16 | 94.90                            | 53.55 |
| XY335    | 105.82                      | 36.95 | 5.43         | 1.98 | 11.99                     | 1.72 | 106.80                           | 48.16 |
| JK968    | 112.15                      | 45.98 | 4.86         | 2.44 | 10.28                     | 2.08 | 87.40                            | 51.96 |
| M751     | 150.84                      | 44.48 | 4.77         | 2.69 | 10.63                     | 2.42 | 92.30                            | 52.82 |
| JNK728   | 115.92                      | 37.41 | 5.35         | 2.08 | 7.97                      | 1.47 | 89.57                            | 49.42 |

### 431 Phenotypic Analysis among Subpopulations

432 Phenotypic parameters were extracted from the images of the test set, and four

433 phenotypic parameters, including coverage, the angle of plant azimuth plane, aspect  
 434 ratio and circumscribed radius were statistically analyzed from the perspective of  
 435 subgroups. Figure 8 shows the results from the phenotypic parameter analysis extracted  
 436 from the image segmentation results of the test set. Among the four subgroups there  
 437 were no statistical differences between the azimuth plane of plant growth and the  
 438 included angle of due north (Figure 8b), while the other three phenotypic parameters  
 439 all had differences within subgroups. In the analysis of the other three phenotypic  
 440 parameters, the extracted values of SS and NSS subgroups were similar, which was  
 441 related to the temperate zone of the two groups of cultivars. The TST subgroup includes  
 442 tropical and subtropical cultivars, so the extracted parameters are different from the SS  
 443 and NSS subgroups. However, the differences of the Mixed subgroup are relatively  
 444 distinct. The results of the coverage analysis (Figure 8a) shows that the coverage value  
 445 of the Mixed subgroup in the test set is low; in contrast, the results of the circumscribed  
 446 radius (Figure 8d) showed a higher extracted value for the Mixed subgroup than that of  
 447 the SS and NSS subgroups. This indicates that the leaves of the Mixed subgroup are  
 448 more slender, resulting in low plant coverage and high leaf extension during the same  
 449 growth period.

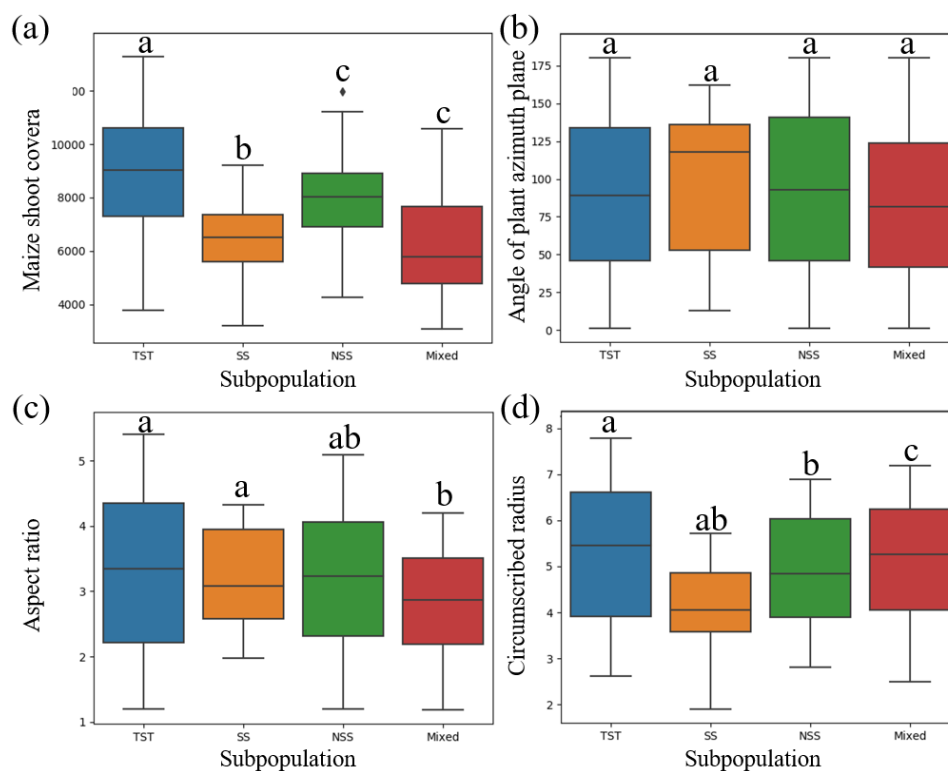

450

451 **Figure 8. Various phenotypic parameters were analyzed based on the**  
 452 **differences of different subgroups**, in which the absence of shared letters  
 453 indicated that the numerical differences of phenotypic parameters among  
 454 subgroups were statistically significant ( $P < 0.05$ ). (a) Coverage, (b) the angle  
 455 of plant azimuth plane, (c) aspect ratio, (d) circumscribed radius.

456 In terms of color phenotype, RGB and HSV phenotypic traits were extracted from  
 457 the top image of the plant. Considering the segmented mask region is composed of

458 many pixels, the mean value of the color of the pixels in the region is taken as the color  
 459 phenotypic parameter of the plants. Similarly, based on the spatial color information of  
 460 RGB and HSV, color traits of maize plants of different subgroups were analyzed  
 461 (Figure 9). According to the analysis of RGB values, there was no obvious difference  
 462 among the subgroups of all cultivars. In the analysis based on HSV color information,  
 463 the TST and NSS subgroups did not show evident differences in color; however, the  
 464 color difference between the TST and NSS subgroups was clear (the H and S of the  
 465 cultivars in the NSS subgroup were higher than those in the TST subgroup).  
 466 Approximately 1/3 of cultivars in both the SS subgroup and the Mixed subgroup were  
 467 different from other cultivars in this subgroup (both H and S were higher than other  
 468 cultivars in this subgroup).

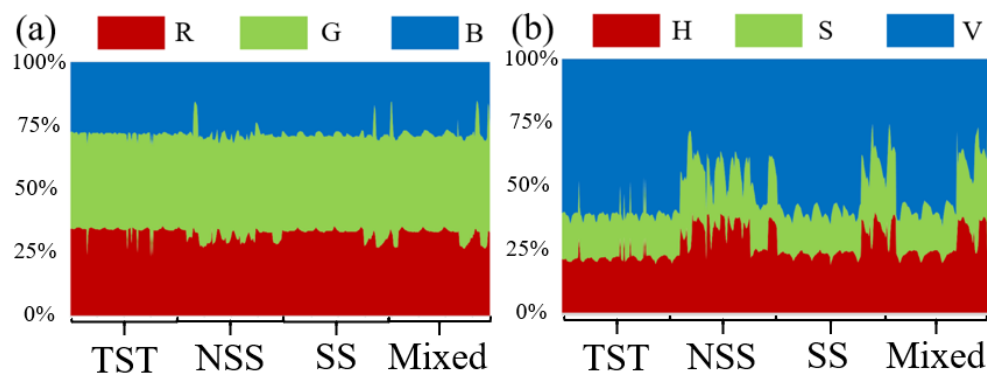

469

470 **Figure 9. Waterfall diagram of foreground plants in top-view images of**  
 471 **maize plants of different subgroups.** (a) RGB mean value analysis, (b) HSV  
 472 mean value analysis.

473 The above results indicated that the PlantU-net model and phenotypic trait  
 474 extraction method could be used to quantitatively analyze the morphological and color  
 475 phenotypic trait differences among subgroups, which was suitable for a correlation  
 476 analysis of genotype–phenotype.

## 477 Discussion

### 478 Image Segmentation

479 At present, the threshold segmentation method is often used to segment top-view  
 480 images of field crops. Although threshold segmentation with specific constraints can  
 481 achieve very similar segmentation results [39,43], threshold segmentation is sensitive  
 482 to noise and the effect on target segmentation is not ideal when there is little difference  
 483 in gray scale. Threshold segmentation in different application scenarios (such as light  
 484 and soil background) is relatively dependent on the selection of an empirical threshold.  
 485 Manually setting different thresholds will greatly increase the workload of the



486 interaction of the segmentation process, and it is difficult to achieve high-throughput in  
487 the processing of large quantities of data [44,46]. In comparison, this study designed  
488 the PlantU-net network model, which can implement end-to-end seedling stage of  
489 maize and group top-view as segmentation with the average segmentation precision of  
490  $P=0.96$  and strong robustness. Under different light conditions and complex  
491 background features (the images used in this study have different background  
492 complexity, including weeds, drip irrigation, dry soil, and  moist soil (Figure 1),  
493 different growth periods, and complex light environments (Figure 5 a)), accurate  
494 segmentation results were obtained without any human input. In addition, it only takes  
495 0.04 s to extract various phenotypic parameters from the overhead image of a single  
496 maize plant (Figure 3) using PlantU-net. Moreover, it is only 0.6 s to extract phenotypic  
497 parameters from the top-view image of a population. The model can achieve high-  
498 throughput phenotypic parameter extraction on the premise of ensuring segmentation  
499 precision.

500 Compared with other algorithms that use deep learning for image segmentation,  
501 the PlantU-net model can improve the segmentation precision by 10% compared with  
502 the U-net model [37] (Table 2), indicating that the PlantU-net model has higher  
503 credibility in the application of top-view images segmentation of maize plants at the  
504 seedling stage. The method proposed by Orsolya Dobos et al. [45] uses U-net and 2,850  
505 images to train the Arabidopsis image segmentation model, while the PlantU-net model  
506 only needs 512 images for training and the training data does not need complex pre-  
507 processing, indicating that PlantU-net achieves high-precision segmentation with less  
508 training data. Therefore, when PlantU-net is used to solve image segmentation  
509 problems in other crops at the seedling stage, only a small number of annotated images  
510 are needed, indicating that the method is highly scalable. Yanan Li et al. [53] proposed  
511 a method called DeepCotton to deal with the segmentation of cotton in the field from  
512 coarse to fine. First, the fully convolutional neural network (FCN) was used for the end-  
513 to-end segmentation of self-collected field images. After extraction of network features,  
514 the "UP" algorithm is proposed to correct the defects in the image. This method  
515 sacrifices processing efficiency by ensuring segmentation precision; the processing  
516 time of this method is approximately 6 s, whereas using PlantU-net to segment a single  
517 image only requires approximately 0.6 s.

## 518 **Phenotypic Analysis**

519 Crop phenotype extraction based on data from top-view images is the main way to  
520 obtain phenotypes from high-throughput phenotyping platforms for many crops [14].  
521 For example, Zhou et al. [39] extracted the phenotypic parameters of maize seedlings  
522 from the gray scale images collected by a UAV phenotyping platform through Otsu  
523 threshold segmentation and skeleton extraction methods. This method has a good  
524 segmentation effect on the overall image, but the extraction precision of the phenotypic  
525 traits of individual plants is limited. The correlation between the seedling emergence

526  determined using the plant-bearing plane statistics and the measured data is only  
527  $\kappa=0.77-0.86$ . In contrast, the PlantU-net segmentation network can not only segment  
528 the top-view image of a single maize plant at the seedling stage with high precision  
529 (Figure 5), but also extract phenotypic parameters with a higher correlation with  
530 measured data ( $R^2>0.96$ ). The results show that the PlantU-net method can replace  
531 artificial measurement and threshold segmentation for quantitative extraction and  
532 evaluation of phenotypic traits.

533 The location and direction of the maize plant remains relatively unchanged, and  
534 the method overcomes the problem of the plants overlapping each other when viewed  
535 from above. Therefore, the information of plant growth and plant azimuth-plane angle  
536 extracted from the top-view image of a maize population can provide measured data  
537 driving 3-D modeling of a maize population [47] and light distribution calculation and  
538 analysis [48] in the later growth stages. At present, the technology and equipment of  
539 high-throughput phenotyping platforms [51], including UAV [49], vehicle-based [50],  
540 and track-type, are developing rapidly, allowing for the collection of phenotypic data  
541 throughout the whole growth period. PlantU-net can also be applied to phenotypically  
542 analyze the top-view of a crop population obtained by multiple phenotypic platforms  
543 and can solve problems such as continuous monitoring of plant selection, analysis of  
544 plant growth difference between different plots, and analysis of plant growth  
545 consistency within the same treatment. These collected data would provide practical  
546 technical means for field crop breeding and cultivation research [52].

547 This study showed the applicability of the PlantU-net model in the extraction of  
548 phenotypic parameters in the seedling stage of maize. However, due to a large number  
549 of cross-shading in the top-view images caused by the overlapping of different plant  
550 leaves, this model could not solve the problem of phenotypic extraction in the middle  
551 and late stage of maize plant growth and development. Future work must determine  
552 how to use top-view continuity and the edge detection ability of the PlantU-net model  
553 to achieve the phenotypic extraction of plants in the middle and late stages of crop  
554 plants.

## 555 Conclusion

556 In this study, an end-to-end segmentation method named PlantU-net was proposed  
557 based on the fully convolutional network, which improved the high-throughput  
558 segmentation performance of a top-view image of a seedling population and realized  
559 the accurate extraction of phenotypic data. The PlantU-net model had an average  
560 segmentation precision of 0.96 for the aerial image of maize plants at the seedling stage,  
561 and the phenotypic parameters extracted from the segmentation results were highly  
562 correlated with the values obtained by manual measurement ( $R^2=0.96-0.99$ ). The model  
563 described in this manuscript is helpful for the segmentation of top-view images of the  
564 maize shoot, the extraction of phenotypes, and the quantitative evaluation of phenotypic

565 traits obtained by high-throughput UAV and ground phenotypic platforms.

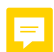

## 566 References

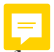

- 567 1. Zhao, C.; Zhang, Y.; Du, J.; Guo, X.; Wen, W.; Gu, S.; Wang, J.; Fan, J. Crop  
568 Phenomics: Current Status and Perspectives. *Front. Plant Sci.* **2019**, *10*,  
569 doi:10.3389/fpls.2019.00714.
- 570 2. Yang, W.; Feng, H.; Zhang, X.; Zhang, J.; Doonan, J.H.; Batchelor, W.D.; Xiong,  
571 L.; Yan, J. Crop Phenomics and High-Throughput Phenotyping: Past Decades,  
572 Current Challenges, and Future Perspectives. *Molecular Plant* **2020**, *13*, 187-214,  
573 doi:10.1016/j.molp.2020.01.008.
- 574 3. Holman, F.; Riche, A.; Michalski, A.; Castle, M.; Wooster, M.; Hawkesford, M.  
575 High Throughput Field Phenotyping of Wheat Plant Height and Growth Rate in  
576 Field Plot Trials Using UAV Based Remote Sensing. *Remote Sensing* **2016**, *8*,  
577 doi:10.3390/rs8121031.
- 578 4. Richard, C.A.; Hickey, L.T.; Fletcher, S.; Jennings, R.; Chenu, K.; Christopher, J.T.  
579 High-throughput phenotyping of seminal root traits in wheat. *Plant Methods* **2015**,  
580 *11*, 13, doi:10.1186/s13007-015-0055-9.
- 581 5. Zheng, Y.Y.; Kong, J.L.; Jin, X.B.; Wang, X.Y.; Zuo, M. CropDeep: The Crop  
582 Vision Dataset for Deep-Learning-Based Classification and Detection in Precision  
583 Agriculture. *Sensors (Basel)* **2019**, *19*, doi:10.3390/s19051058.
- 584 6. White, J.W.; Andrade-Sanchez, P.; Gore, M.A.; Bronson, K.F.; Coffelt, T.A.;  
585 Conley, M.M.; Feldmann, K.A.; French, A.N.; Heun, J.T.; Hunsaker, D.J. Field-  
586 based phenomics for plant genetics research. *133*, 101-112.
- 587 7. Scharr, H. Leaf segmentation in plant phenotyping: a collation study. *Machine*  
588 *Vision & Applications* **2016**, *27*, 585-606.
- 589 8. Das Choudhury, S.; Samal, A.; Awada, T. Leveraging Image Analysis for High-  
590 Throughput Plant Phenotyping. *Front Plant Sci* **2019**, *10*, 508,  
591 doi:10.3389/fpls.2019.00508.
- 592 9. Velumani, K.; Oude Elberink, S.; Yang, M.Y.; Baret, F. Wheat Ear Detection in  
593 Plots by Segmenting Mobile Laser Scanner Data. *ISPRS Annals of*  
594 *Photogrammetry, Remote Sensing and Spatial Information Sciences* **2017**, *IV-*  
595 *2/W4*, 149-156, doi:10.5194/isprs-annals-IV-2-W4-149-2017.
- 596 10. Nguyen, T.T.N.; Le, T.-L.; Vu, H.; Hoang, V.-S.; Tran, T.-H. Crowdsourcing for  
597 botanical data collection towards to automatic plant identification: A review.  
598 *Computers and Electronics in Agriculture* **2018**, *155*, 412-425,  
599 doi:10.1016/j.compag.2018.10.042.
- 600 11. Lu, H.; Cao, Z.G.; Xiao, Y.; Li, Y.A.; Zhu, Y.J. Region-based colour modelling for  
601 joint crop and maize tassel segmentation. *Biosyst. Eng.* **2016**, *147*, 139-150,  
602 doi:10.1016/j.biosystemseng.2016.04.007.
- 603 12. Janssens, O.; Vylder, J.D.; Aelterman, J.; Verstockt, S.; Walle, R.V.D. Leaf

- 604 segmentation and parallel phenotyping for the analysis of gene networks in plants.  
605 In Proceedings of European Signal Processing Conference (EUSIPCO).
- 606 13. Lièvre, M.; Wuyts, N.; Cookson, S.J.; Bresson, J.; Dapp, M.; Vasseur, F.o.;  
607 Massonnet, C.; Tisné, S.; Bettembourg, M.; Balsera, C. Phenotyping the kinematics  
608 of leaf development in flowering plants: recommendations and pitfalls. Wiley  
609 *Interdisciplinary Reviews Developmental Biology* 2, n/a-n/a.
- 610 14. Praveen Kumar, J.; Domnic, S. Image based leaf segmentation and counting in  
611 rosette plants. *Information Processing in Agriculture* **2019**, 6, 233-246,  
612 doi:10.1016/j.inpa.2018.09.005.
- 613 15. Hamuda, E.; Glavin, M.; Jones, E. A survey of image processing techniques for  
614 plant extraction and segmentation in the field. *Computers and Electronics in  
615 Agriculture* **2016**, 125, 184-199, doi:10.1016/j.compag.2016.04.024.
- 616 16. Gehan, M.A.; Fahlgren, N.; Abbasi, A.; Berry, J.C.; Sax, T. PlantCV v2: Image  
617 analysis software for high-throughput plant phenotyping. *PeerJ* **2017**, 5, e4088.
- 618 17. Yin, X.; Liu, X.; Chen, J.; Kramer, D.M. Joint Multi-Leaf Segmentation,  
619 Alignment, and Tracking for Fluorescence Plant Videos. *IEEE Transactions on  
620 Pattern Analysis & Machine Intelligence* **2015**, PP.
- 621 18. Alenya, G.; Dellen, B.; Foix, S.; Torras, C. Robotized Plant Probing: Leaf  
622 Segmentation Utilizing Time-of-Flight Data. *IEEE Robotics & Automation  
623 Magazine* 20, 50-59.
- 624 19. Kulikov, V.; Yurchenko, V.; Lempitsky, V. Instance Segmentation by Deep  
625 Coloring.
- 626 20. Unseok, L.; Sungyul, C.; Anantrio, P.G.; Hyounseok, K.; Hwan, K.D.; Hector, C.  
627 An automated, high-throughput plant phenotyping system using machine learning-  
628 based plant segmentation and image analysis. *PLoS One* 13, e0196615-.
- 629 21. Zhang, S.W.; You, Z.H.; Wu, X.W. Plant disease leaf image segmentation based on  
630 superpixel clustering and EM algorithm. *Neural Comput. Appl.* **2019**, 31, 1225-  
631 1232, doi:10.1007/s00521-017-3067-8.
- 632 22. Mahlein, A.K. Plant Disease Detection by Imaging Sensors - Parallels and Specific  
633 Demands for Precision Agriculture and Plant Phenotyping. *Plant Dis.* **2016**, 100,  
634 241-251, doi:10.1094/pdis-03-15-0340-fe.
- 635 23. Sekulska-Nalewajko, J.; Goclawski, J.; Chojak-Kozniewska, J.; Kuzniak, E.  
636 Automated image analysis for quantification of reactive oxygen species in plant  
637 leaves. *Methods* **2016**, 109, 114-122, doi:10.1016/j.ymeth.2016.05.018.
- 638 24. Wu, Q.; Sun, H.; Li, M.Z.; Song, Y.Y.; Zhang, Y.E. Research on Maize  
639 Multispectral Image Accurate Segmentation and Chlorophyll Index Estimation.  
640 *Spectrosc. Spectr. Anal.* **2015**, 35, 178-183, doi:10.3964/j.issn.1000-  
641 0593(2015)01-0178-06.
- 642 25. Mochida, K.; Koda, S.; Inoue, K.; Hirayama, T.; Tanaka, S.; Nishii, R.; Melgani, F.  
643 Computer vision-based phenotyping for improvement of plant productivity: a  
644 machine learning perspective. *Gigascience* **2019**, 8,  
645 doi:10.1093/gigascience/giy153.

- 646 26. Gao, L.W.; Lin, X.H. Fully automatic segmentation method for medicinal plant  
647 leaf images in complex background. *Computers and Electronics in Agriculture*  
648 **2019**, 164, 14, doi:10.1016/j.compag.2019.104924.
- 649 27. Barth, R.; Ijsselmuiden, J.; Hemming, J.; Van Henten, E.J. Synthetic bootstrapping  
650 of convolutional neural networks for semantic plant part segmentation. *Computers*  
651 *and Electronics in Agriculture* **2019**, 161, 291-304,  
652 doi:10.1016/j.compag.2017.11.040.
- 653 28. Chen, G.F.; Hu, J.; Li, D.L.; Si, X.L. Image Recognition of Maize Diseases Based  
654 on Fuzzy Clustering and Support Vector Machine Algorithm. *Sens. Lett.* **2012**, 10,  
655 433-438, doi:10.1166/sl.2012.1882.
- 656 29. Ward, D.; Moghadam, P.; Hudson, N. Deep Leaf Segmentation Using Synthetic  
657 Data. **2018**, arXiv:1807.10931 [cs.CV], doi:arXiv:1807.10931 [cs.CV].
- 658 30. Lin, K.; Gong, L.; Huang, Y.; Liu, C.; Pan, J. Deep Learning-Based Segmentation  
659 and Quantification of Cucumber Powdery Mildew Using Convolutional Neural  
660 Network. *Front Plant Sci* **2019**, 10, 155, doi:10.3389/fpls.2019.00155.
- 661 31. Ma, X.; Deng, X.W.; Qi, L.; Jiang, Y.; Li, H.W.; Wang, Y.W.; Xing, X.P. Fully  
662 convolutional network for rice seedling and weed image segmentation at the  
663 seedling stage in paddy fields. *PLoS One* **2019**, 14, 13,  
664 doi:10.1371/journal.pone.0215676.
- 665 32. Ma, J.C.; Du, K.M.; Zheng, F.X.; Zhang, L.X.; Gong, Z.H.; Sun, Z.F. A recognition  
666 method for cucumber diseases using leaf symptom images based on deep  
667 convolutional neural network. *Computers and Electronics in Agriculture* **2018**, 154,  
668 18-24, doi:10.1016/j.compag.2018.08.048.
- 669 33. Barbedo, J.G.A. Plant disease identification from individual lesions and spots using  
670 deep learning. *Biosyst. Eng.* **2019**, 180, 96-107,  
671 doi:10.1016/j.biosystemseng.2019.02.002.
- 672 34. Wang, G.; Sun, Y.; Wang, J.X. Automatic Image-Based Plant Disease Severity  
673 Estimation Using Deep Learning. *Comput. Intell. Neurosci.* **2017**,  
674 10.1155/2017/2917536, 8, doi:10.1155/2017/2917536.
- 675 35. Zhou, C.; Ye, H.; Xu, Z.; Hu, J.; Shi, X.; Hua, S.; Yue, J.; Yang, G. Estimating  
676 Maize-Leaf Coverage in Field Conditions by Applying a Machine Learning  
677 Algorithm to UAV Remote Sensing Images. *Applied Sciences* **2019**, 9,  
678 doi:10.3390/app9112389.
- 679 36. Yang, X.; Gao, S.; Xu, S.; Zhang, Z.; Prasanna, B.M.; Li, L.; Li, J.; Yan, J.  
680 Characterization of a global germplasm collection and its potential utilization for  
681 analysis of complex quantitative traits in maize. *Molecular Breeding* **2010**, 28, 511-  
682 526, doi:10.1007/s11032-010-9500-7.
- 683 37. Ronneberger, O.; Fischer, P.; Brox, T. U-Net: Convolutional Networks for  
684 Biomedical Image Segmentation. arXiv:1505.04597v1 [cs.CV] **2015**.
- 685 38. Goutte, C.; Gaussier, E. A Probabilistic Interpretation of Precision, Recall and F-  
686 Score, with Implication for Evaluation. **2005**, 51, 952-952.
- 687 39. Zhou, C.; Yang, G.; Liang, D.; Yang, X.; Xu, B. An Integrated Skeleton Extraction



- 688 and Pruning Method for Spatial Recognition of Maize Seedlings in MGVI and UAV  
689 Remote Images. *IEEE Transactions on Geoscience and Remote Sensing* **2018**, 56,  
690 4618-4632, doi:10.1109/tgrs.2018.2830823.
- 691 40. Zhou, C.; Ye, H.; Xu, Z.; Hu, J.; Shi, X.; Hua, S.; Yue, J.; Yang, G. Estimating  
692 Maize-Leaf Coverage in Field Conditions by Applying a Machine Learning  
693 Algorithm to UAV Remote Sensing Images. *Applied Sciences* **2019**, 9,  
694 doi:10.3390/app9112389.
- 695 41. Wen, W.L.; Guo, X.Y.; Zhao, C.J.; Xiao, B.X.; Wang, Y.J. Research on Maize Plant  
696 Type Parameter Extraction by Using Three Dimensional Digitizing Data. *Scientia  
697 Agricultura Sinica* **2018**.
- 698 42. Berry, J.C.; Fahlgren, N.; Pokorny, A.A.; Bart, R.S.; Veley, K.M. An automated,  
699 high-throughput method for standardizing image color profiles to improve image-  
700 based plant phenotyping. *PeerJ* **2018**, 6, doi:10.7717/peerj.5727.
- 701 43. Cinat, P.; Di Gennaro, S.F.; Berton, A.; Matese, A. Comparison of Unsupervised  
702 Algorithms for Vineyard Canopy Segmentation from UAV Multispectral Images.  
703 *Remote Sensing* **2019**, 11, 24, doi:10.3390/rs11091023.
- 704 44. Gocławski, J.; Sekulska-Nalewajko, J.; Kuźniak, E. Neural network segmentation  
705 of images from stained cucurbits leaves with colour symptoms of biotic and abiotic  
706 stresses. *International Journal of Applied Mathematics and Computer Science* **2012**,  
707 22, 669-684, doi:10.2478/v10006-012-0050-5.
- 708 45. Dobos, O.; Horvath, P.; Nagy, F.; Danka, T.; András, V. A deep learning-based  
709 approach for high-throughput hypocotyl phenotyping; 2019; 10.1101/651729.
- 710 46. Wang, Y.; Xu, L.H. Unsupervised segmentation of greenhouse plant images based  
711 on modified Latent Dirichlet Allocation. *PeerJ* **2018**, 6, 31, doi:10.7717/peerj.5036.
- 712 47. Wen W.;Zhao C.;Guo X.;Wang Y.;Du J.;Yu Z. Construction method of three-  
713 dimensional model of maize colony based on t-distribution function. *Transactions  
714 of the Chinese Society of Agricultural Engineering* 2018; 10.11975/j.issn.1002-  
715 6819.2018.04.023.
- 716 48. Wen, W.; Guo, X.; Li, B.; Wang, C.; Wang, Y.; Yu, Z.; Wu, S.; Fan, J.; Gu, S.; Lu,  
717 X. Estimating canopy gap fraction and diffuse light interception in 3D maize  
718 canopy using hierarchical hemispheres. *Agricultural and Forest Meteorology* **2019**,  
719 276-277, 107594, doi:https://doi.org/10.1016/j.agrforment.2019.05.025.
- 720 49. Gevaert, C.; Persello, C.; Vosselman, G. Optimizing Multiple Kernel Learning for  
721 the Classification of UAV Data. *Remote Sensing* **2016**, 8, doi:10.3390/rs8121025.
- 722 50. Primicerio, J.; Gennaro, S.F.D.; Fiorillo, E.; Genesio, L.; Lugato, E.; Matese, A.;  
723 Vaccari, F.P. A flexible unmanned aerial vehicle for precision agriculture. *Precision  
724 Agriculture* 13, 517-523.
- 725 51. Andradesanchez, P. Development and evaluation of a field-based high-throughput  
726 phenotyping platform. *Functional Plant Biology* **2014**, 41.
- 727 52. Yang, W.; Guo, Z.; Huang, C.; Wang, K.; Jiang, N.; Feng, H.; Chen, G.; Liu, Q.;  
728 Xiong, L. Genome-wide association study of rice (*Oryza sativa*L.) leaf traits with  
729 a high-throughput leaf scorer. *Journal of Experimental Botany* 2015, 66, 5605-

730 5615, doi:10.1093/jxb/erv100.

731 53. Li, Y.A.; Cao, Z.G.; Xiao, Y.; Cremers, A.B. DeepCotton: in-field cotton  
732 segmentation using deep fully convolutional network. *J. Electron. Imaging* **2017**,  
733 26, 14, doi:10.1117/1.Jei.26.5.053028.

734
