# Supplementary material for: High-throughput phenotyping analysis of maize at the seedling stage using end-to-end segmentation network
Source: PubMed Central journal article supplement (PMC7802938; doi:10.1371/journal.pone.0241528), 2021-01-12
Supplement: pone.0241528.s008.pdf [file pone.0241528.s008.pdf]

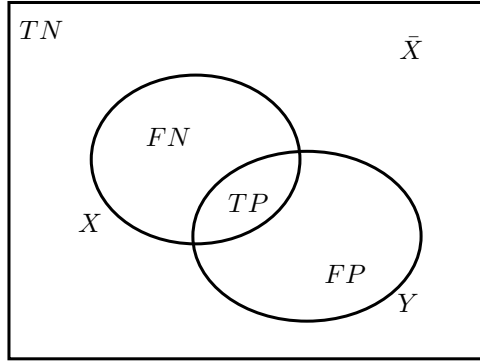

Figure 1: Key to symbols:  $X$  = positives ('ground truth'),  $\bar{X}$  = negatives ('ground truth'),  $Y$  = predicted positives,  $TP$  = true positives,  $TN$  = true negatives,  $FP$  = false positives and  $FN$  = false negatives.

**Theorem 1.** *In a one-class segmentation problem the Sørensen-Dice coefficient (DSC) and the  $F_1$  score are equivalent.*

*Proof.* By definition:

$$DSC = \frac{2|X \cap Y|}{|X| + |Y|} \quad (1)$$

where  $|\cdot|$  indicates 'the cardinality of'. Now, with reference to Fig. 1, we have:

$$DSC = \frac{2TP}{2TP + FN + TP} \quad (2)$$

On the other hand, again by definition, we have:

$$F_1 = 2 \frac{PR}{P + R} \quad (3)$$

where  $P$  and  $R$  respectively indicate *precision* and *recall*, i.e.:

$$P = \frac{TP}{TP + FP} \quad (4)$$

$$R = \frac{TP}{TP + FN} \quad (5)$$

From Eq. 4–5 we obtain:

$$P + R = \frac{TP(2TP + FP + FN)}{(TP + FN)(TP + FP)} \quad (6)$$

$$PR = \frac{TP^2}{(TP + FN)(TP + FP)} \quad (7)$$

Finally, substituting Eq. 6–7 into Eq. 3 we get:

$$F_1 = \frac{2TP}{2TP + FP + FN} \quad (8)$$

□
