# Supplementary material for: High-throughput phenotyping analysis of maize at the seedling stage using end-to-end segmentation network
Source: PLoS One. 2021 Jan 12;16(1):e0241528. doi: 10.1371/journal.pone.0241528 (PMC7802938; doi:10.1371/journal.pone.0241528)
Supplement: S3 File — (XLSX) [file pone.0241528.s003.xlsx]

## Sheet: Sheet1
Cover Degree(pixel)	Aspect Ratio	Circumcircle	Plant Azimuthal Plane	Sub Population
13267	3.54	5.85	132	TST
10965	4.76	3.42	112	TST
10360	3.29	6.93	13	TST
9860	4.44	7.56	176	TST
9639	1.59	6.6	148	TST
9024	3.15	6.36	141	TST
6692	1.51	5.8	173	TST
11733	5.09	7.53	83	TST
7719	2.11	4.56	23	TST
11113	5.06	2.89	117	TST
8984	2.73	3.73	9	TST
10509	2.39	7.05	26	TST
7539	3.73	3.18	24	TST
9522	3.69	2.98	39	TST
11344	4.16	7.64	171	TST
10848	4.69	4.78	137	TST
6814	5.2	7.13	86	TST
8263	5.37	5.52	165	TST
5861	5.11	6.95	136	TST
7833	4.13	3.48	33	TST
7514	4.45	3.26	143	TST
11339	5.1	5.42	18	TST
10247	2.7	6	138	TST
11698	3.91	7.04	99	TST
6311	5.04	7.48	35	TST
10821	2.97	4.34	155	TST
10149	3.64	5.76	84	TST
10050	1.72	4.15	178	TST
7184	3.36	6.31	131	TST
9998	1.99	2.84	47	TST
6547	4.27	7.31	100	TST
6307	3.95	3.23	172	TST
5852	2.95	4.79	145	TST
6951	4.4	7.54	114	TST
7272	2.03	3.86	120	TST
7150	1.2	3.93	156	TST
10314	3.2	5.87	170	TST
9722	2.75	7.49	122	TST
6148	3.66	7.67	36	TST
9375	4.79	3.49	34	TST
10990	3.08	5.65	55	TST
6037	5.02	3.94	154	TST
10833	1.7	4	29	TST
11309	1.23	7.29	76	TST
5998	1.69	6.48	161	TST
8804	2.54	5.68	63	TST
10312	1.38	2.61	175	TST
7692	3.82	5.97	72	TST
9365	2.07	4.72	46	TST
6573	3.79	4.32	45	TST
11321	4.71	5.56	40	TST
7918	3.11	3.69	2	TST
9056	3.67	7.41	61	TST
7169	5.38	3	102	TST
6520	4.32	4.64	58	TST
11522	2.19	6.74	168	TST
10362	2.56	3.3	126	TST
11376	3.22	4.36	21	TST
7027	2.67	6.08	49	TST
9455	4.88	3.76	20	TST
9095	1.39	3.75	133	TST
10637	1.88	3.31	163	TST
8827	4.23	5.86	129	TST
10074	5.27	3.02	54	TST
10441	2.68	6.82	30	TST
7425	4.56	5.05	59	TST
6238	2.17	3.52	177	TST
9084	4.43	3.8	28	TST
7163	2.99	4.47	7	TST
7940	4.78	4.63	31	TST
10745	4.66	4.39	19	TST
8970	4.1	4.53	67	TST
10930	1.87	7.75	69	TST
8404	5.19	2.99	174	TST
6119	3.16	6.06	95	TST
11193	3.37	4.8	111	TST
11040	4.03	7.01	8	TST
5935	2.41	4.55	146	TST
9283	2.8	4.96	121	TST
9717	5.24	5.14	37	TST
9579	1.95	7.12	78	TST
10551	4.35	4.82	109	TST
10518	3.18	4.93	4	TST
11789	4.34	7.08	103	TST
11951	5.03	4.44	38	TST
8544	4.29	6.7	149	TST
8662	3.86	2.92	97	TST
10234	4.11	2.66	101	TST
7868	5.23	6.61	91	TST
6422	4.38	4.04	164	TST
9074	5.29	3.4	152	TST
8563	2.65	3.22	98	TST
8541	2.35	6.88	22	TST
9969	5.08	4.97	158	TST
6987	2.51	3.65	125	TST
3789	2.2	3.89	48	TST
11184	1.48	5.64	90	TST
9612	2.78	6.29	179	TST
11609	3.62	2.63	115	TST
8748	4.28	5.15	150	TST
8924	3.43	4.52	92	TST
6294	1.63	7.59	17	TST
7948	1.28	5.99	105	TST
6853	4.85	5.92	25	TST
6700	1.71	7.7	134	TST
11508	4.91	7.63	27	TST
9882	2.98	3.47	75	TST
7460	2.29	7.07	57	TST
8265	3.88	4.94	79	TST
10714	3.77	3.17	60	TST
9690	2.89	7.66	77	TST
9464	2.44	7.24	124	TST
7768	2.62	3.83	66	TST
8795	3.45	7.46	166	TST
10615	2.21	3.28	128	TST
9416	2.4	5.94	88	TST
10697	1.75	6.18	74	TST
7760	1.6	7.18	116	TST
9019	1.56	5.7	15	TST
7699	4.72	6.83	6	TST
7882	3.33	6.34	52	TST
7610	2.18	3.12	123	TST
8109	4.6	5.51	157	TST
11271	4.04	4.17	87	TST
11942	3.35	3.6	140	TST
10622	3.13	3.32	71	TST
11358	3.41	4.45	104	TST
10504	3.89	7.76	180	TST
10898	1.37	7.27	153	TST
10678	4.2	5.84	73	TST
7838	3.17	2.73	142	TST
11312	4.17	7.77	62	TST
9294	2.08	5.88	94	TST
8010	3.5	4.05	14	TST
11338	3.87	4.23	5	TST
9642	4.97	6.03	110	TST
8084	4.77	6.87	12	TST
10467	4.67	6.58	159	TST
11570	4.21	4.6	169	TST
5911	2.94	2.69	50	TST
11990	1.9	6.37	119	TST
6586	1.94	4.38	151	TST
8718	2.86	5.18	89	TST
11595	1.58	4.71	135	TST
9045	5.16	5.5	167	TST
7904	5.25	7.2	160	TST
7251	3.99	7.52	53	TST
5967	3.38	3.7	44	TST
8665	2.71	3.9	3	TST
5871	1.46	5.49	82	TST
10479	5.18	5.98	85	TST
9314	2.33	6.52	144	TST
7322	2.82	5.46	106	TST
10043	3.97	5.83	41	TST
6637	2.26	5.95	16	TST
11875	2.14	3.72	70	TST
8965	2.43	3.92	108	TST
7747	1.31	6.26	93	TST
8278	2.77	5.67	162	TST
6103	2.48	7.1	113	TST
6958	3.68	3.82	1	TST
5902	2.53	5.79	147	TST
6776	1.82	4.42	51	TST
10831	4.64	3.61	42	TST
6397	4.31	4.29	96	TST
11917	2.06	7	139	TST
6137	1.62	2.76	64	TST
9409	1.84	4.3	127	TST
11156	1.54	6.76	81	TST
8826	2.96	2.95	32	TST
7843	1.76	3.79	11	TST
9358	3.23	3.62	68	TST
8222	4.83	6.19	130	TST
11961	4.01	5.44	80	TST
10125	3.75	2.94	63	TST
6933	1.47	3.33	70	TST
6728	2.42	6.62	26	TST
9679	4.7	6.4	175	TST
7949	5.36	5.03	94	TST
10812	2.61	4.07	88	TST
9147	4.52	6.3	76	TST
5880	2.47	6.97	117	TST
6225	4.58	4.11	164	TST
11574	4.84	6.39	118	TST
7368	2.02	6.17	105	TST
8310	1.74	6.86	68	TST
10184	2.1	7.16	139	TST
11016	1.55	7.21	57	TST
11516	3.7	6.72	66	TST
11004	1.33	5.39	42	TST
10744	2.25	7.35	73	TST
7888	4.25	4.27	43	TST
8474	1.42	3.38	86	TST
8674	2	6.32	45	TST
9078	3.19	3.44	112	TST
8820	4.12	4.18	82	TST
5913	1.83	4.62	138	TST
9837	5.4	7.72	46	TST
9386	5	6.33	142	TST
11557	3.76	6.94	87	TST
6391	1.49	5.91	116	TST
11632	1.77	3.05	30	TST
11607	2.36	6.85	145	TST
8394	3.31	6.78	120	TST
7302	3.57	3.59	37	TST
8459	3.94	5.59	25	TST
7061	5.35	4.95	172	TST
11669	4.19	3.58	27	TST
11586	2.24	7.45	127	TST
8919	4.99	4.1	2	TST
9168	3.52	7.74	49	TST
6985	5.28	7.02	173	TST
6186	2.01	5.66	111	TST
6299	4.09	2.8	14	TST
6445	5.34	6.38	157	TST
12564	4.95	7.78	9	TST
4251	3.39	5.09	131	TST
11980	4.53	6.24	89	TST
4005	1.21	5.17	115	TST
3980	1.35	4.12	85	TST
4125	5.13	6.21	5	TST
6475	3.36	2.48	159	SS
7047	3.16	4.59	13	SS
8195	1.98	5.6	53	SS
7840	2.72	5.64	79	SS
6988	2.39	5.71	124	SS
5495	3.39	3.78	133	SS
4890	3.96	3.8	130	SS
7959	3.94	3.61	151	SS
4851	4.33	4.52	162	SS
5357	2.41	3.04	134	SS
6023	3.88	4.56	125	SS
7217	2.51	3.47	107	SS
7730	2.21	4.16	52	SS
5204	2.2	3.66	114	SS
8662	3.97	3.82	99	SS
5825	3.68	3.05	40	SS
6456	2.76	3.86	33	SS
6945	2.79	1.89	64	SS
5867	4.23	5.7	143	SS
7366	2.62	3.77	158	SS
6738	4.1	5.54	122	SS
5333	3.9	5.11	38	SS
5622	4.26	4.78	92	SS
5999	2.6	2.76	129	SS
5743	3.01	1.92	147	SS
8601	2.33	4.67	149	SS
6832	2.89	5.19	32	SS
7396	1.97	4.15	36	SS
6535	4.13	5.36	75	SS
3320	3.59	2.71	47	SS
3208	2.99	4.18	128	SS
9208	4.14	3.95	160	SS
10701	4.59	6.42	93	NSS
9152	3.6	5.99	135	NSS
7767	1.57	3.62	146	NSS
8745	1.96	4.57	55	NSS
6988	3.71	5.44	102	NSS
11215	3.37	3.91	34	NSS
11984	3.2	3.99	155	NSS
10894	2.24	4.74	180	NSS
8379	3.3	4.22	174	NSS
4562	1.65	4.34	168	NSS
6683	3.03	5.01	74	NSS
7732	4.02	6.78	96	NSS
4321	1.89	5.86	83	NSS
4251	2.25	5.58	113	NSS
8245	3.78	3.01	58	NSS
7891	2.22	5.34	161	NSS
7109	2.02	3.35	167	NSS
7792	2.4	3.71	176	NSS
8192	3.59	4.25	109	NSS
7209	2.93	5.23	165	NSS
9298	3.96	6.03	23	NSS
7532	2.07	3.59	101	NSS
8001	1.94	4.78	1	NSS
8026	2.92	3.49	95	NSS
7354	1.81	6.53	97	NSS
8287	1.55	5.73	178	NSS
7274	3.23	3.23	51	NSS
8039	2.46	3.97	19	NSS
7421	3.64	5.88	100	NSS
6538	3.67	4.85	69	NSS
8523	3.89	4.29	22	NSS
6079	1.72	3.54	81	NSS
7132	4.8	4.55	10	NSS
6240	3.62	5.18	106	NSS
7000	3.42	2.9	98	NSS
8137	4.29	6.48	54	NSS
8238	3.13	6.63	103	NSS
7335	1.71	3.67	148	NSS
9569	3.95	2.94	171	NSS
8477	3.38	3.46	17	NSS
9579	3.27	6.72	177	NSS
8395	4.97	5.71	39	NSS
6856	3.32	4.05	15	NSS
8848	3.7	6.61	140	NSS
8885	1.77	3.94	166	NSS
9766	4.53	4.68	153	NSS
5784	4.4	3.77	31	NSS
9790	3.02	5.15	6	NSS
8537	3.56	6.2	48	NSS
6645	5	6.35	152	NSS
7981	2.87	5.19	90	NSS
7770	3.17	6.89	3	NSS
8275	4.58	5.4	16	NSS
7061	1.75	5.82	141	NSS
5927	4.92	3.84	67	NSS
7601	3.58	4.48	121	NSS
9347	1.92	3.25	21	NSS
8508	2.69	3.36	80	NSS
6153	2.51	6.36	126	NSS
8738	4.03	3.28	59	NSS
9738	3.21	6.71	41	NSS
8517	3.12	3.88	50	NSS
9311	2.62	4.6	20	NSS
9201	2.48	6.38	150	NSS
9763	3.08	4.3	91	NSS
6130	1.64	3.14	144	NSS
9977	4.34	6.32	56	NSS
8430	2.7	4.7	104	NSS
6848	2.26	4.4	154	NSS
7368	2.55	6.76	71	NSS
8125	1.7	6.31	35	NSS
5618	2.18	5.28	28	NSS
6399	4.27	5.52	44	NSS
7284	4.74	4.1	18	NSS
8221	3.43	5.65	170	NSS
7477	1.84	6.7	78	NSS
6226	2.67	6.13	29	NSS
9828	3.9	6.39	12	NSS
6727	3.86	4.99	60	NSS
9514	1.59	6.9	7	NSS
6508	4.44	3.4	110	NSS
7610	1.97	4.88	61	NSS
8933	2.39	3.45	123	NSS
7955	1.98	3.2	62	NSS
9510	3.55	4.93	119	NSS
8402	3.75	6.51	11	NSS
8791	4.33	4.11	77	NSS
9509	4.5	3.69	179	NSS
6503	4.32	6.22	137	NSS
8225	1.63	4.54	72	NSS
9266	4.72	6.05	4	NSS
8188	4.43	5.08	108	NSS
5691	2.76	6.44	15	NSS
6992	4.09	5.32	151	NSS
9639	3.1	4.61	57	NSS
8084	2.27	4.87	167	NSS
6467	3.84	6.27	24	NSS
8472	5.07	3.98	138	NSS
7742	3.65	5.06	34	NSS
9744	4.78	6.8	116	NSS
8478	3.34	2.88	125	NSS
5909	4.89	3.61	5	NSS
6895	2.63	5.87	35	NSS
7025	2.03	4.97	150	NSS
6722	4.12	6.84	158	NSS
6746	1.2	6.02	93	NSS
8530	2.23	6.1	140	NSS
9474	4.87	3.21	90	NSS
5599	4.23	4.79	165	NSS
8813	2.16	4.42	73	NSS
7929	2.74	6.79	176	NSS
8515	2.96	6.16	146	NSS
9815	4.67	3.64	133	NSS
9163	3.57	6.14	153	NSS
6677	3.88	5.33	42	NSS
9054	3.18	3.63	92	NSS
8742	4.3	6.77	163	NSS
9604	4.48	2.8	137	NSS
6693	2.97	5.53	174	NSS
9852	4.46	4.72	95	NSS
6155	2.95	2.93	7	NSS
6392	3.48	3.86	27	NSS
9616	4.91	5.78	96	NSS
9305	4.61	4.77	23	NSS
5794	2.12	6.04	136	NSS
5764	2.36	3.7	135	NSS
7848	5.01	4.31	77	NSS
8054	4.41	6.66	162	NSS
6271	2.59	4	87	NSS
9062	3.19	2.83	141	NSS
9928	2.09	4.18	68	NSS
7579	3.36	3.76	156	NSS
6920	1.87	4.66	61	NSS
8067	5.09	5.04	129	NSS
5554	4.36	6.45	102	NSS
7294	2.65	5.22	31	NSS
8944	3.77	3.05	172	NSS
7167	1.69	4.53	62	NSS
7241	2.38	4.21	85	NSS
9549	4.16	2.5	130	Mixed
9589	3.22	4	139	Mixed
4957	3.34	4.03	118	Mixed
6371	3.19	4.4	112	Mixed
6983	3.98	5.39	12	Mixed
8020	2.64	4.94	128	Mixed
8397	2.18	5.33	98	Mixed
4505	2.02	6.54	76	Mixed
4780	2.14	3.2	46	Mixed
5689	1.87	2.61	114	Mixed
5197	2.27	4.72	175	Mixed
5308	1.91	6.86	131	Mixed
10580	3.37	5.8	99	Mixed
9981	3.18	5.02	97	Mixed
7905	2.06	4.02	3	Mixed
5033	2.94	7.19	19	Mixed
6075	3.65	7.12	81	Mixed
5163	3.11	6.5	83	Mixed
3676	4.05	3.69	123	Mixed
4763	3.67	6.67	94	Mixed
7544	1.73	4.81	106	Mixed
5567	3.28	5.22	53	Mixed
7978	2.24	5.23	26	Mixed
5700	2.69	6.38	9	Mixed
6510	2.46	6.12	110	Mixed
8441	2.68	4.43	124	Mixed
7843	2.76	3.13	41	Mixed
5126	1.89	6.89	148	Mixed
5030	1.92	6.18	30	Mixed
7550	3.33	6.24	147	Mixed
4729	2.19	6.78	65	Mixed
4488	3.93	6.23	120	Mixed
3583	2.42	5.36	16	Mixed
3643	3.56	4.35	149	Mixed
4435	3.5	5.81	126	Mixed
7518	3.29	5.43	142	Mixed
4221	3	3.11	78	Mixed
6710	3.13	6.29	17	Mixed
4348	3.68	4.24	155	Mixed
5109	2.07	2.79	29	Mixed
3321	3.05	6.63	179	Mixed
4042	3.54	3.12	79	Mixed
7003	3.94	6.07	6	Mixed
4836	3.89	3.84	28	Mixed
3070	3.96	7.07	159	Mixed
3617	3.8	6.59	18	Mixed
5210	3.53	3.14	157	Mixed
3897	2.71	5.38	56	Mixed
5297	3.23	2.58	60	Mixed
7236	1.94	5.52	100	Mixed
7480	1.74	6.51	91	Mixed
4283	2.7	6.41	109	Mixed
8443	2.11	4.87	25	Mixed
5029	4.03	4.66	161	Mixed
6228	2.13	5.48	40	Mixed
4965	3.75	4.17	59	Mixed
4197	3.16	5.35	64	Mixed
8895	1.64	2.84	119	Mixed
3574	2.82	4.54	22	Mixed
7746	3.47	4.75	152	Mixed
3976	2.09	5.03	101	Mixed
6791	2.31	6.53	72	Mixed
7636	2.36	4.49	80	Mixed
7964	2.58	3.86	177	Mixed
7232	2.15	4.86	44	Mixed
7341	4.02	6.77	45	Mixed
4954	2.53	7.02	11	Mixed
7963	2.67	6.16	169	Mixed
8498	2.41	4.5	36	Mixed
6249	1.83	6.08	166	Mixed
7840	3.25	6.52	84	Mixed
5395	4.1	4.14	121	Mixed
7249	3.45	6.56	52	Mixed
8831	2.6	5.51	171	Mixed
5024	2.01	6.94	32	Mixed
5311	1.63	6.68	20	Mixed
7603	4.2	5.91	33	Mixed
3802	3.51	6	113	Mixed
7128	3.57	5.05	14	Mixed
6599	3.64	6.33	47	Mixed
5786	2.9	3.85	74	Mixed
5588	1.72	6.13	63	Mixed
8613	2.21	5.99	55	Mixed
5781	2.88	3.76	38	Mixed
5169	1.85	4.2	143	Mixed
6905	2.08	5.21	58	Mixed
8595	2.98	4.76	104	Mixed
6420	2.72	4.82	75	Mixed
7990	3.97	5.75	39	Mixed
3593	2.54	6.93	43	Mixed
5037	3.14	2.66	66	Mixed
6119	3.86	2.78	49	Mixed
7842	3.03	3.46	108	Mixed
7453	2.97	5.88	180	Mixed
8839	3.78	2.51	117	Mixed
4661	2.85	3.28	145	Mixed
8027	3.01	5.28	82	Mixed
3658	1.76	7.05	132	Mixed
3500	4.13	6.39	1	Mixed
4940	1.61	4.9	2	Mixed
4328	3.99	5.49	10	Mixed
7805	2.47	3.62	178	Mixed
4960	3.49	5.24	160	Mixed
5480	2.32	5.74	67	Mixed
7097	2.52	3.88	134	Mixed
8332	1.18	3.73	103	Mixed
8056	3.87	7.14	71	Mixed
3520	2.83	6.1	37	Mixed
4685	2.05	3.39	89	Mixed
7663	2.63	3.75	88	Mixed
